1 Title: Inhibitory interneurons show early dysfunction in a SOD1 mouse model of Amyotrophic  
2 Lateral Sclerosis

3

4 Running Title: Dysfunction of inhibitory interneurons in ALS

5

6 C. F. CAVARSAN<sup>1,2</sup>, P. R. STEELE<sup>1,2,3</sup>, L. M. McCANE<sup>3</sup>, K. J. LaPRE<sup>1,2</sup>, A. C. PURITZ<sup>4</sup>, N. KATENKA<sup>5</sup>,  
7 AND K. A. QUINLAN<sup>1,2,4</sup>

8 1 George and Anne Ryan Institute for Neuroscience, University of Rhode Island, Kingston, RI, 02881 USA

9 2 Department of Biomedical and Pharmaceutical Sciences, College of Pharmacy, University of Rhode Island,  
10 Kingston, RI, 02881 USA

11 3 Interdisciplinary Neuroscience Program, University of Rhode Island, Kingston, RI, 02881 USA

12 4 Department of Physiology, Northwestern University Feinberg School of Medicine, Chicago, IL, 60611 USA

13 5 Department of Computer Science and Statistics, University of Rhode Island, Kingston, RI, 02881 USA

14

15

16 Corresponding Author:

17 Katharina A. Quinlan (<https://orcid.org/0000-0002-6177-4849>)

18 kaquinlan@uri.edu

19 George and Anne Ryan Institute for Neuroscience

20 University of Rhode Island

21 130 Flagg Rd

22 Kingston RI 02881

23

24 Category according to the table of contents: Neuroscience

25 **Key words:** inhibition, glycine, Renshaw cells, amyotrophic lateral sclerosis, spinal cord, patch  
26 clamp.

27

28

29 **Key Points Summary:**

- 30 • Spinal inhibitory interneurons could contribute to amyotrophic lateral sclerosis (ALS) pathology,  
31 but their excitability has never been directly measured.
- 32 • We studied the excitability and morphology of glycinergic interneurons in postnatal transgenic  
33 mice (SOD1<sup>G93A</sup>GlyT2eGFP).
- 34 • Interneurons were less excitable and had smaller somas but larger primary dendrites in SOD1  
35 mice.
- 36 • GlyT2 interneurons were analyzed according to their localization within the ventral spinal cord.  
37 Interestingly, the greatest differences were observed in the most ventrally-located interneurons.
- 38 • We conclude that inhibitory interneurons show presymptomatic changes that may contribute to  
39 excitatory / inhibitory imbalance in ALS.

40

41 **Abstract:** Few studies in amyotrophic lateral sclerosis (ALS) focus on the inhibitory interneurons  
42 synapsing onto motoneurons (MNs). However, inhibitory interneurons could contribute to dysfunction,  
43 particularly if altered before MN neuropathology and establish a long-term imbalance of inhibition /  
44 excitation. We directly assessed excitability and morphology of glycinergic (GlyT2) interneurons located  
45 throughout the ventral horn in the lumbar enlargement from SOD1<sup>G93A</sup>GlyT2eGFP (SOD1) and wildtype  
46 GlyT2eGFP (WT) mice on postnatal day 6 to 10. Patch clamp revealed dampened excitability in SOD1  
47 interneurons, including depolarized persistent inward currents (PICs), depolarized threshold for firing  
48 action potentials, and a shortened afterhyperpolarization (AHP). SOD1 inhibitory interneurons also had  
49 smaller somata but primary dendrites showed larger volume and surface area than WT. GlyT2  
50 interneurons were then divided into 3 subgroups based on location: (1) interneurons within 100  $\mu\text{m}$  of  
51 the ventral white matter, where Renshaw cells (RCs) are located, (2) interneurons interspersed with  
52 MNs in lamina IX, and (3) interneurons in the intermediate ventral area including laminae VII and VIII.  
53 Ventral interneurons were the most profoundly affected, including more depolarized PICs, smaller  
54 somata and larger primary dendrites. Interneurons in lamina IX had depolarized PIC onset, smaller  
55 somata and longer primary dendrites. In lamina VII-VIII, interneurons were largely unaffected, mainly  
56 showing smaller somata. In summary, inhibitory interneurons show very early region-specific  
57 perturbations poised to impact excitatory / inhibitory balance of MNs, modify motor output, and  
58 provide early biomarkers of ALS. Therapeutics like riluzole which universally reduce CNS excitability  
59 could exacerbate the inhibitory dysfunction described here.

60 **Abstract Figure:**

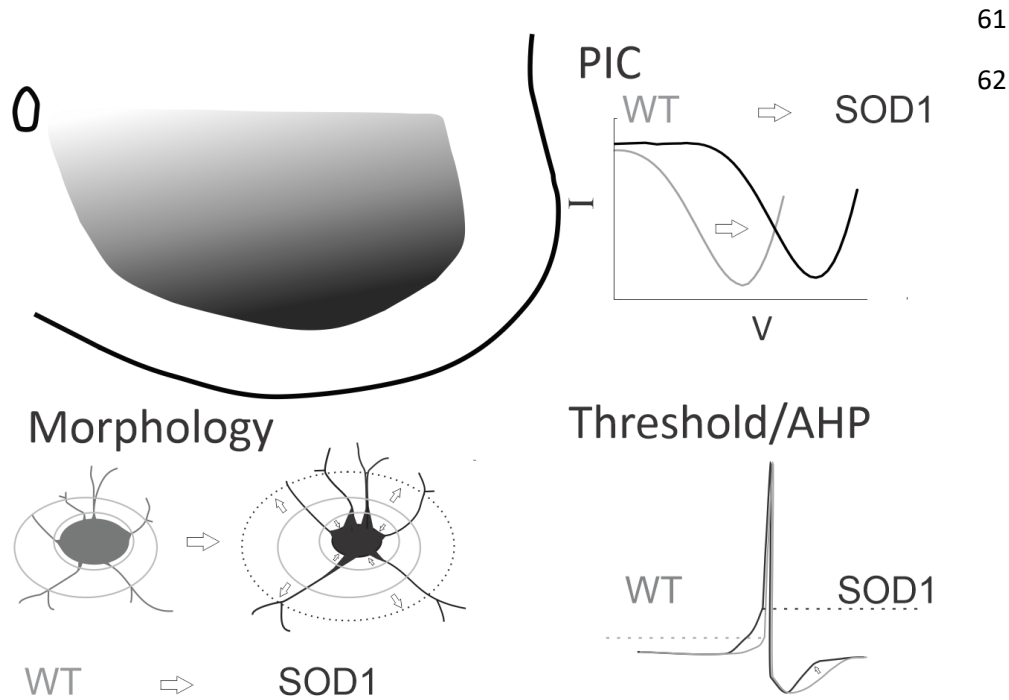

**Abstract Figure:** SOD1 glycinergic interneurons in the ventral horn show altered morphology and excitability, including depolarization of PICs, depolarized threshold, shorter AHPs, smaller somata and larger primary dendrites. Ventrally located interneurons are the most prominently affected.

## 63 Introduction

64

65 Amyotrophic lateral sclerosis (ALS) is a rapidly evolving adult-onset neurological disease characterized by  
66 a progressive loss of corticospinal neurons and MNs. There has been considerable debate in the field  
67 over the role of hyperexcitability in neurodegenerative processes in ALS. While drug treatment for ALS  
68 based on nonspecific reduction of neuronal excitability (with riluzole, for example) (Bellingham 2011),  
69 results in a modest increase in lifespan (Bensimon et al., 1994), similar treatment paradigms have been  
70 disappointing clinically. A more nuanced understanding of the excitability of vulnerable neurons could  
71 help in creating a more targeted and effective approach for treatment of ALS. For example, if inhibitory  
72 pathways are failing in ALS and neuronal excitability is universally reduced with riluzole, this could  
73 further exacerbate inhibitory dysfunction by reducing activity not only in vulnerable MNs but also in  
74 inhibitory interneurons presynaptic to MNs. Thus it is important to consider all aspects of neuronal  
75 excitability, including intrinsic excitability of vulnerable neurons, synaptic drive, and neuromodulation  
76 (Gunes et al., 2020). Intrinsic properties of MNs have been well studied but the same is not true for  
77 interneurons that are synaptically connected to them. In fact, no studies thus far have directly assessed  
78 activity of spinal premotor interneurons in an ALS model.

79 Despite evidence that ALS patients have disrupted inhibition at spinal levels (Raynor and Shefner, 1994;  
80 Shefner and Logigian, 1998; Sangari et al., 2016; Howells et al., 2020; Özyurt et al., 2020), much is still  
81 unknown concerning the involvement of inhibitory circuitry in ALS. Morphological alterations in  
82 inhibitory circuits have been demonstrated in animal models of ALS. These include degeneration of  
83 spinal interneurons, fewer neurons expressing markers of inhibitory neurotransmitters including GlyT2  
84 prior to loss of MNs (Martin et al., 2007; Hossaini et al., 2011), and loss of glycinergic boutons onto MNs  
85 prior to symptom onset (Chang and Martin, 2009a). Typically, fast MNs have greater numbers of  
86 inhibitory synaptic contacts, but these are largely lost in SOD1 mice beginning when motor unit atrophy  
87 is first observed (Pun et al., 2006; Hegedus et al., 2007; Allodi et al., 2021). Recurrent inhibitory circuits  
88 mediated by RCs are impaired before symptom onset by both loss of MN collaterals which provide  
89 synaptic drive, and complex changes to RC-MN synaptic structures (Casas et al., 2013; Wootz et al.,  
90 2013). A few studies have suggested activity is decreased in inhibitory interneurons by indirect  
91 measurements. Quantification of synaptic inputs to MNs has shown that frequency of inhibitory  
92 postsynaptic potentials in spinal MNs is decreased embryonically in both SOD1 mouse and zebrafish  
93 models (McGown et al., 2013; Branchereau et al., 2019) and glycinergic inputs to MNs decay faster in

94 SOD1 MNs (Medelin et al., 2016). On a larger scale, blocking the activity of V1 inhibitory interneurons  
95 during *in vivo* treadmill running was recently found to mimic the early locomotor deficits in SOD1 mice  
96 (Allodi et al., 2021), suggesting that inhibitory interneurons could be inactive or under-active. However,  
97 none of these studies directly examined electrophysiological activity in inhibitory interneurons.  
98 We hypothesized that inhibitory spinal interneurons could contribute to the pathogenesis of ALS  
99 through a depression of MN inhibition. Decreased activity of inhibitory interneurons could result in  
100 synaptically-driven hyperexcitability of MNs and other long-term changes in network function. In this  
101 study, we examined electrical and morphological properties of glycinergic interneurons in the spinal  
102 cord of SOD<sup>G93A</sup> GlyT2-eGFP (SOD1) mice compared to GlyT2-eGFP (WT) using whole cell patch clamp  
103 and three-dimensional reconstructions. We show here that significant dysfunction is present in SOD1  
104 glycinergic interneurons which likely comprise several subclasses of inhibitory interneurons. In general,  
105 SOD1 glycinergic interneurons are less excitable and smaller than WT. Impairment in glycinergic  
106 interneurons should be explored as both a mechanism of vulnerability of MNs and a potential biomarker  
107 of early dysfunction of spinal circuits.

108

## 109 **Materials and Methods**

110

### 111 **Ethics Statement**

112 Experiments were performed in accordance with the United States National Institutes of Health Guide for  
113 Care and Use of Laboratory Animals. Approval from Northwestern University's Animal Care and Use  
114 Committee (IS00001228) was obtained for all experiments performed in this study. All efforts were made  
115 to minimize animal suffering and to reduce the number of animals used.

116

### 117 **Animals and Tissue harvest**

118 Transgenic B6SJL mice overexpressing the human *SOD1*<sup>G93A</sup> gene (strain 002726, Jackson Labs, Bar Harbor,  
119 ME, USA) and their wild type littermates were used (nontransgenic for the human *SOD1*<sup>G93A</sup> gene).  
120 Transgenic animals were identified using standard PCR techniques by Transnetyx (Cordova, TN, USA) and  
121 were bred with GlyT2-eGFP mice (Zeilhofer et al., 2005) generating SOD1<sup>G93A</sup> GlyT2-eGFP mice, here called  
122 SOD1. Inhibitory glycinergic interneurons express the Na<sup>+</sup> and Cl<sup>-</sup> coupled glycine transporter 2, or GlyT2  
123 and GlyT2-eGFP expression is driven by the GlyT2 promoter. Specifically, GlyT2-eGFP females were bred  
124 with SOD1<sup>G93A</sup> GlyT2-eGFP males, and progeny were used for experiments before genotyping was

125 performed. GlyT2-eGFP are referred to as wild type (WT), not carrying the SOD1<sup>G93A</sup> mutation. For the  
126 following studies juvenile mouse pups were used between postnatal day (P) 6 - 10. Mice were deeply  
127 anesthetized with isoflurane (Henry Schein Animal Health, Dublin, OH, USA), decapitated and eviscerated.  
128 The lumbar spinal cord from L1 - L6 was removed and embedded in 2.5% w/v agar (No. A-7002, Sigma-  
129 Aldrich, St Louis, MO, USA). The agar block was then superglued with Loctite 401 (Henkel Corporation,  
130 Rocky Hill, CN, USA) to a stainless steel slicing chuck and 350  $\mu$ m transverse slices were made using the  
131 Leica 1000 vibratome (Leica Microsystems, Buffalo Grove, IL, USA) as described previously (Quinlan et al.,  
132 2011). During both spinal cord isolation and slicing, the spinal cord was immersed in 1–4°C high osmolarity  
133 dissecting solution containing (mM): sucrose 234.0, KCl 2.5, CaCl<sub>2</sub> · 2H<sub>2</sub>O 0.1, MgSO<sub>4</sub> · 7H<sub>2</sub>O 4.0, HEPES  
134 15.0, glucose 11.0, and Na<sub>2</sub>PO<sub>4</sub> 1.0. The pH was adjusted to 7.35 when bubbled with 95% O<sub>2</sub>/5% CO<sub>2</sub> using  
135 1 M KOH (Fluka Analytical, Sigma-Aldrich). After cutting, the slices were incubated for >1 h at 30°C in  
136 incubating solution containing (mM): NaCl 126.0, KCl 2.5, CaCl<sub>2</sub> · 2H<sub>2</sub>O 2.0, MgCl<sub>2</sub> · 6H<sub>2</sub>O 2.0, NaHCO<sub>3</sub> 26.0,  
137 glucose 10.0, pH 7.4 when bubbled with 95% O<sub>2</sub>/5% CO<sub>2</sub> (all reagents for solutions were purchased from  
138 Sigma-Aldrich).

139

#### 140 **Electrophysiology**

141 Whole cell patch clamp was performed on interneurons from the lumbar segments using 2–4 M $\Omega$  glass  
142 electrodes pulled from glass capillary tubes (Item #TW150F-4, World Precision Instruments, Sarasota, FL,  
143 USA) with a Flaming-Brown P-97 (Sutter Instrument Company, Novato, CA, USA). Electrodes were  
144 positioned using a Sutter Instrument MP-285 motorized micromanipulator (Sutter Instrument Company).  
145 Whole-cell patch clamp measurements were performed at room temperature using the Multiclamp700B  
146 amplifier (Molecular Devices, Burlingame, CA, USA) and Winfluor software (University of Strathclyde,  
147 Glasgow, Scotland). Briefly, slices were perfused with a modified Ringer's solution containing (in mM): 111  
148 NaCl, 3.09 KCl, 25.0 NaHCO<sub>3</sub>, 1.10 KH<sub>2</sub>PO<sub>4</sub>, 1.26 MgSO<sub>4</sub>, 2.52 CaCl<sub>2</sub>, and 11.1 glucose. The solution was  
149 oxygenated with 95% O<sub>2</sub>/5% CO<sub>2</sub>, and the perfusion rate was 2.5 – 3.0 ml/min. Patch electrodes contained  
150 (in mM) 138 K-gluconate, 10 HEPES, 5 ATP-Mg, 0.3 GTP-Li and Texas Red dextran (150  $\mu$ M, 3000 MW,  
151 from Invitrogen, Life Technologies, Grand Island, NY, USA). In voltage-clamp mode, fast and slow  
152 capacitance transients, as well as whole-cell capacitance, were compensated using the automatic  
153 capacitance compensation on the Multiclamp. Whole cell capacitance was recorded from the Multiclamp.

154

155 *Neuron Selection:* Glycinergic interneurons were visually selected for recording based on 1) expression of  
156 GFP, and 2) location in the ventral horn. Neurons that did not repetitively fire or did not maintain a resting  
157 membrane potential below -35 mV were excluded from electrophysiological analysis.

158

159 *Electrophysiological analysis:* Holding potential was set at -90 mV, and neurons were subjected to slow,  
160 depolarizing voltage ramps of 22.5 mV s<sup>-1</sup>, bringing the cell to 0 mV in 4 s, and then back to the holding  
161 potential in the following 4 s. In current clamp, neurons were subjected to depolarizing current ramps for  
162 testing I-on (the current level at firing onset), I-off (the current level at cessation of firing), and the slope  
163 of the frequency-current relationship. The difference between I-on and I-off is calculated for  $\Delta I$ . Negative  
164 current was often necessary to prevent action potential (AP) firing. Resting membrane potential was  
165 recorded as the potential when 0 current was injected in voltage clamp. Persistent inward current (PIC)  
166 parameters were measured after subtraction of leak current. Onset was defined as the voltage at which  
167 the current began to deviate from the horizontal, leak-subtracted trace. PIC peak was the voltage at which  
168 the PIC reached peak amplitude. The linear portion of leak current (usually between -90 and -75 mV) was  
169 used to calculate whole cell input resistance. The first action potential in the train evoked by a depolarizing  
170 current ramp in current clamp mode was used to measure all parameters relating to action potentials.  
171 Threshold voltage was defined as the voltage at which the slope exceeded 10 V/s. Threshold for action  
172 potential firing was tested in two ways. The first was to use the voltage at firing onset from the current  
173 ramps up to 130 pA/s (in current clamp). The second was the voltage at which a single action potential  
174 could be evoked with a current step. Action potential overshoot is the voltage past 0 mV the first spike  
175 (from a ramp) reaches. Duration of the action potential is measured at half of action potential height  
176 (height is defined as overshoot - threshold voltage). Rates of rise and fall are defined as the peak and the  
177 trough of the first derivative of the action potential profile. Instantaneous firing frequency range max was  
178 the maximum firing rate that could be evoked from a neuron. It was measured from the first or second  
179 firing frequencies on a large (>150pA) depolarizing step. Steady state firing frequency range minimum was  
180 the lowest firing frequency evoked from a small (~50pA) depolarizing step. Hyperpolarizing steps were  
181 used to measure I<sub>H</sub>. The sag and rebound were measured from largest evoked response. Sag potential was  
182 calculated as a % of the total amplitude of the hyperpolarization. If a spike was evoked on rebound, the  
183 voltage threshold was used as amplitude of rebound. AHP duration was measured from a single spike fired  
184 during a period in which the membrane potential was stable. Amplitude was measured as the downward  
185 deflection from the membrane potential. Duration of the AHP was measured from the falling phase of the

186 spike at baseline potential to the time of recovery to baseline membrane potential. Half amplitude  
187 duration was measured as the duration at half of the measured AHP amplitude from the falling phase of  
188 the spike at baseline potential. Tau is measured as the rate of decay from the last third of the AHP.

189

190 *Regional classification:* Photos were taken of position of the patch electrode within the spinal cord slices  
191 after recording was complete. These photos were used to recreate a map of the position of the  
192 interneurons. Interneurons within the ventral-most region of the spinal cord (within 100 $\mu$ m of the  
193 ventral white matter) were grouped into the RC region described previously (Siembab et al., 2010).  
194 Neurons that were located within and on the lateral edges of the motor pools (in between motoneuron  
195 and the white matter) were classified as lamina IX interneurons. Since the location of the motor pools  
196 varied throughout the lumbar enlargement, this classification was determined by examination of the z  
197 stacks and photos. Neurons that were not found within lamina IX and were not within the ventral RC  
198 region were grouped as the intermediate region of Lamina VII/VIII. All patched neurons were filled with  
199 Texas Red dextran to allow their 3D reconstruction. Reconstructions were limited to the first dendritic  
200 node (more details in following section).

201

## 202 **Morphological analysis**

203 Neuron morphology was assessed from two types of images: 1) 2-photon image stacks of live neurons  
204 taken immediately after obtaining electrophysiological parameters, and 2) confocal image stacks taken  
205 after fixation and tissue processing. Images collected using these two methods were analyzed separately  
206 due to tissue shrinkage during the fixation process. Measurements from patched neurons included both  
207 soma and dendrites (soma volume, soma surface area; and average [per dendrite] dendrite length, total  
208 dendrite length [per cell], average and total dendrite surface area and average and total dendrite  
209 volume). Dendrite reconstructions were performed up to the first node for several reasons, including  
210 variable dye filling of fine processes of distal dendrites and potential extension of dendrites outside of  
211 the areas imaged. Measurements of GFP+ glycinergic interneurons from fixed tissue samples included  
212 soma volume and soma surface area. Reconstructions were made based on the sum of many z stacks,  
213 resulting in 3D images. Data is generated using NeuroLucida software (MBF Bioscience, Williston, VT,  
214 USA): volume is computed by sum of each section area, multiplied by the thickness; surface area is the  
215 sum of each section perimeter of the reconstruction multiplied by the thickness; dendrites are modeled  
216 as the somata but using each piece of each branch as a frustum.



217

218 *Two-photon imaging:* An Olympus BX-51WIF microscope fitted with an Olympus 40x/0.8NA water-  
219 dipping objective lens was used. Two-photon excitation fluorescence microscopy was performed with a  
220 galvanometer-based Coherent Chameleon Ultra II laser (Coherent, Santa Clara, CA, USA) tuned to 900  
221 nm. A red Bio-Rad 2100MPD photomultiplier tube (Bio-Rad, Hercules, CA, USA) (570 – 650 nm) was used  
222 to collect emission in the red channel. Z-stacks were obtained for each interneuron at 1024 x 1024 pixels  
223 (308 x 308  $\mu\text{m}$ ) resolution and roughly 100  $\mu\text{m}$  in depth (step size 1  $\mu\text{m}$ ). From these Z-stacks, Texas  
224 Red<sup>®</sup> -filled neurons were three-dimensionally reconstructed, as described above, using Neurolucida  
225 software.

226

227 *Confocal imaging:* Sections were observed with a confocal laser microscope (LSM510, Zeiss,  
228 Oberkochen, Darmstadt, Germany) with argon (488 nm) and a 20X objective. From these Z-stacks, GlyT2  
229 positive interneurons were three-dimensionally reconstructed using Neurolucida software as described  
230 above. Dimensions of neurons in each image stack were averaged before compiling numbers. The total  
231 number of analyzed interneurons was 4,138, composed of 2,551 neurons from 36 WT image stacks and  
232 1,587 interneurons from 44 SOD1 image stacks.

233

## 234 **Statistical analysis**

235 The assumptions of homogeneity of variances and the normality of the distribution of values for each  
236 measured characteristic were evaluated with Levine's and Shapiro-Wilk tests, respectively. Group  
237 comparisons (WT vs SOD1) were performed using one-way ANOVA on parameters that satisfied both  
238 conditions (homogeneity and normality of distribution) and using the Kruskal-Wallis test for those that  
239 did not. Results are presented as means +/-SEM. Significance level was set at  $p \leq 0.05$ .

240

## 241 **Results**

242

### 243 **Morphology of glycinergic interneurons**

244 Ventrally located glycinergic interneurons in the lumbar enlargement of WT and SOD1 mice postnatal  
245 day (P) 6-10 were reconstructed from z-stack images obtained using confocal microscopy. SOD1 GlyT2  
246 interneurons were significantly smaller than WT GlyT2 interneurons. Soma volume and surface area  
247 were both significantly smaller in SOD1 GlyT2 interneurons found throughout the ventral horn. Typical

248 ventrolateral glycinergic neurons are shown in **Figure 1**. Complete reconstructions of soma morphology  
249 were performed on 4138 GlyT2 interneurons (2551 WT and 1587 SOD1 interneurons) from fixed lumbar  
250 spinal cords from 18 mice (9 WT and 9 SOD1). See **Table 1** for all morphological parameters. Dendritic  
251 morphology was not possible in these images due to the high number of GFP+ neurons and processes  
252 but was performed on a smaller subset of neurons that were imaged live after patch clamp  
253 electrophysiology with a 2-photon microscope.

254

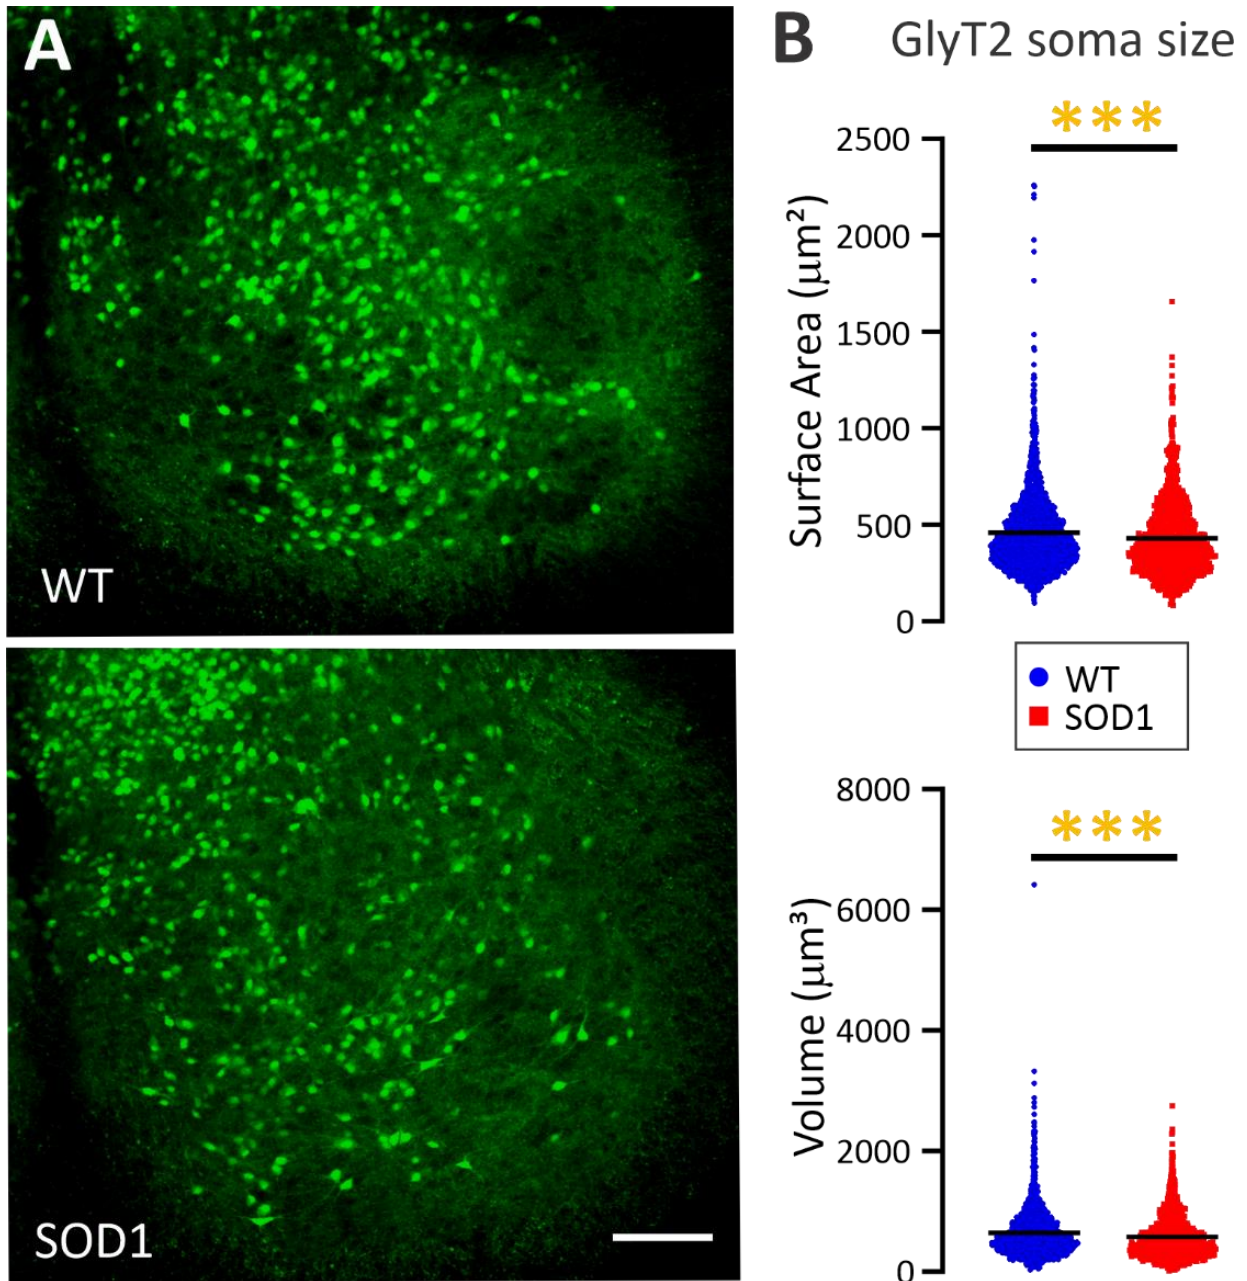

**Figure 1: GlyT2 interneurons in the ventral horn from SOD1 mice are smaller than WT.** Representative photomicrographs of spinal cord showing GFP interneurons (green) in **A**. **(B)** Morphological analysis showed SOD1 glycinergic interneurons in ventral horn ( $N = 1587$ ) were smaller in than WT ( $N = 2551$ ). Significance denoted with \*\*\* indicates  $p \leq 0.001$ . Scale bar in **A**:  $100 \mu\text{m}$  applies to both images.

255

256

**Table 1:** Reconstruction data of GlyT2-GFP+ interneurons in WT and SOD1 animals.

| <b>Ventral horn GlyT2-GFP+ Interneurons (somata only)</b> |                                           |                        |                         |                    |
|-----------------------------------------------------------|-------------------------------------------|------------------------|-------------------------|--------------------|
|                                                           |                                           | <b>WT (Mean ± SE)</b>  | <b>SOD (Mean ± SE)</b>  | <b>p</b>           |
|                                                           |                                           | N = 2551               | N = 1587                |                    |
| <b>Soma</b>                                               | Surface Area ( $\mu\text{m}^2$ )          | 459.8 ( $\pm 4.1$ )    | 430.5 ( $\pm 4.9$ ) *** | 0.000 <sup>K</sup> |
|                                                           | Volume ( $\mu\text{m}^3$ )                | 641.1 ( $\pm 8.0$ )    | 576.5 ( $\pm 9.2$ ) *** | 0.000 <sup>K</sup> |
| <b>Patched GlyT2-GFP+ Interneurons</b>                    |                                           |                        |                         |                    |
|                                                           |                                           | N = 34                 | N = 25                  |                    |
| <b>Soma</b>                                               | Surface Area ( $\mu\text{m}^2$ )          | 621.1 ( $\pm 41.6$ )   | 674.6 ( $\pm 54.8$ )    | 0.728 <sup>K</sup> |
|                                                           | Volume ( $\mu\text{m}^3$ )                | 1460.2 ( $\pm 185.6$ ) | 1751.2 ( $\pm 222.6$ )  | 0.414 <sup>K</sup> |
| <b>Primary Dendrites</b>                                  | Total Length ( $\mu\text{m}$ )            | 108.5 ( $\pm 21.7$ )   | 114.4 ( $\pm 10.5$ )    | 0.152 <sup>K</sup> |
|                                                           | Total Dendrite Length ( $\mu\text{m}$ )   | 101.4 ( $\pm 17.3$ )   | 103.8 ( $\pm 10.1$ )    | 0.905              |
|                                                           | Average Dendrite length ( $\mu\text{m}$ ) | 29.3 ( $\pm 3.5$ )     | 31.3 ( $\pm 2.7$ )      | 0.663              |
|                                                           | Total Surface Area ( $\mu\text{m}^2$ )    | 539.9 ( $\pm 87.6$ )   | 700.3 ( $\pm 53.5$ ) *  | 0.032 <sup>K</sup> |
|                                                           | Average Surface Area ( $\mu\text{m}^2$ )  | 155.5 ( $\pm 17.5$ )   | 207.8 ( $\pm 17.9$ ) *  | 0.025 <sup>K</sup> |
|                                                           | Total Volume ( $\mu\text{m}^3$ )          | 272.2 ( $\pm 48.6$ )   | 423.1 ( $\pm 40.1$ ) *  | 0.009 <sup>K</sup> |
|                                                           | Average Volume ( $\mu\text{m}^3$ )        | 78.6 ( $\pm 11.0$ )    | 126.5 ( $\pm 13.5$ ) *  | 0.008 <sup>K</sup> |

Significance denoted with \* indicates  $p \leq 0.05$ ; \*\*\* indicates  $p < 0.001$ .

N is the number of cells included in analysis.

<sup>K</sup> Indicates Kruskal-Wallis Test for nonparametric distributions; all others were ANOVA analysis.

257

258 To study electrophysiological properties of GlyT2 interneurons, 59 glycinergic neurons (34 WT and 25  
 259 SOD1) were recorded using visually guided patch clamp with Texas Red dye in the electrode as shown in  
 260 **Figure 2**. The location of patched neurons was distributed throughout the ventral horn as shown in Fig  
 261 2B. In this smaller sample of neurons, soma sizes of patched SOD1 interneurons were not different (Fig  
 262 2C). However, dendrites, analyzed up to the first node (branching point), were larger in patched SOD1  
 263 GlyT2 interneurons, including greater dendritic surface area and volume (see Table 1 for complete  
 264 results). The number of primary dendrites was not different in SOD1 vs WT interneurons. Please note  
 265 that dimensions of these neurons cannot be directly compared to the previous section since these  
 266 neurons were imaged in living tissue while the previous analysis was performed in fixed tissue, which  
 267 shrinks.

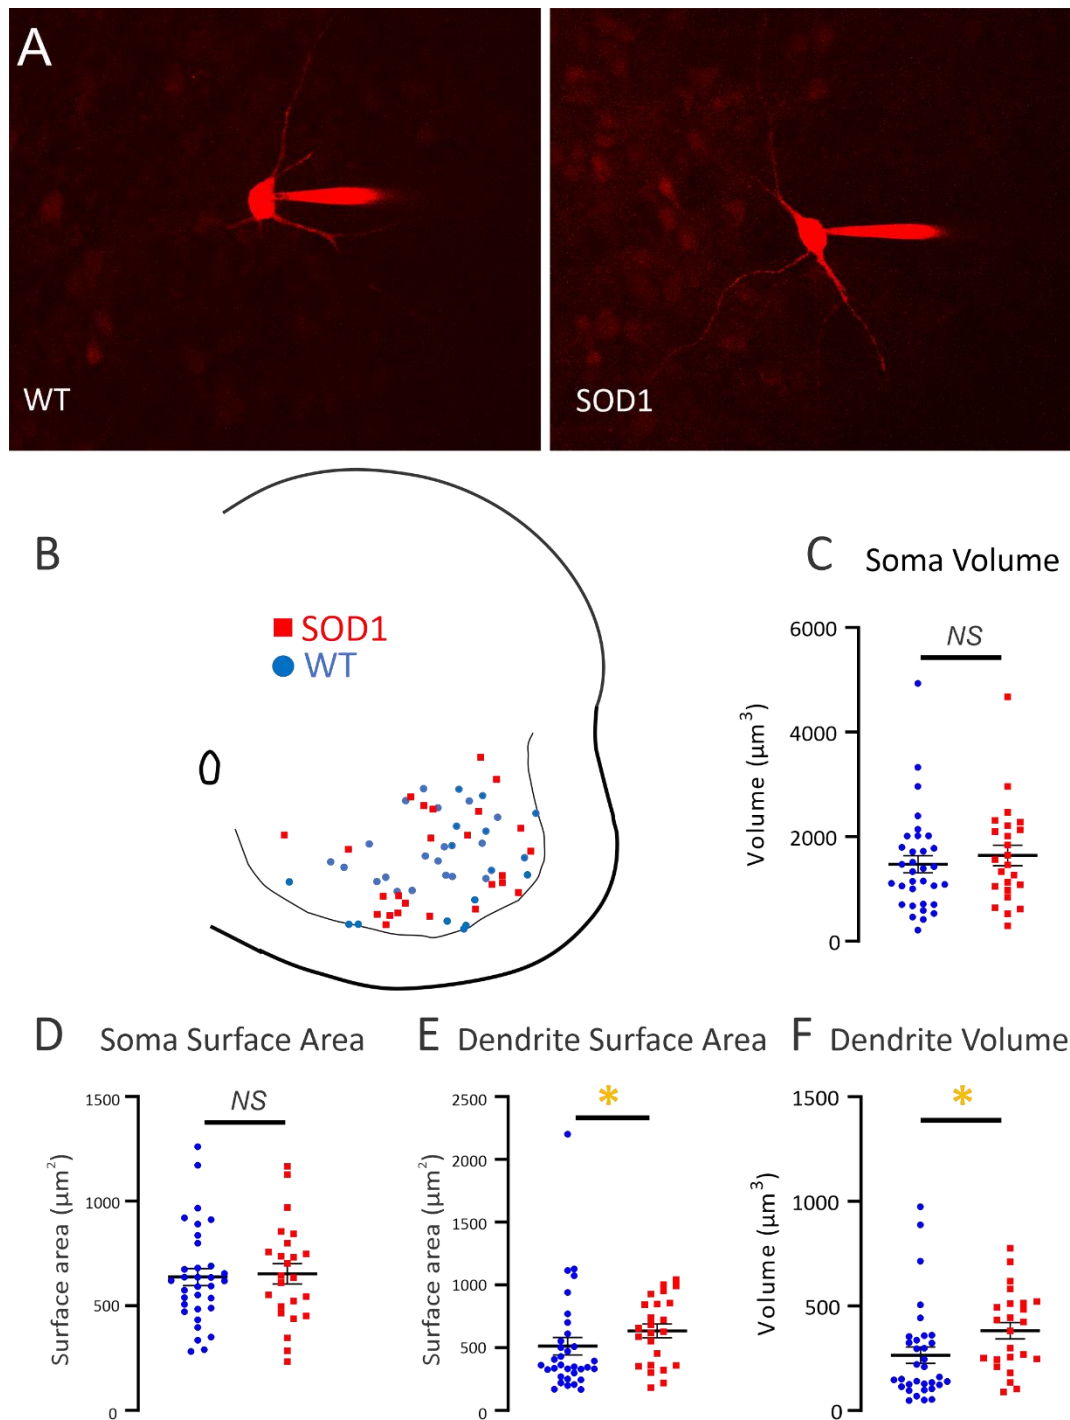

**Figure 2 GlyT2 interneurons from WT and SOD1 mice were patched throughout the ventral horn.** Images of typical interneurons, filled with Texas Red as they were recorded in **A**, and locations of all patched interneurons in **B** (WT = blue circles, SOD1 = red squares). **(C)** Soma volume and **(D)** soma surface area was unchanged in patched neurons, while total surface area and total volume of primary dendrites **(E and F)** were larger in SOD1 interneurons than in WT. Significance denoted with \* indicates  $p \leq 0.05$ .

## Electrophysiology of glycinergic interneurons

269

270 Whole cell patch clamp revealed very different intrinsic properties of ventral glycinergic interneurons.  
271 Recording was performed on 59 ventral interneurons from throughout the ventral horn in transverse  
272 lumbar spinal cord slices from P6-10 mice. SOD1 inhibitory interneurons ( $n = 25$ ) were found to have  
273 diminished intrinsic excitability compared to WT interneurons ( $n = 34$ ). Measurements of intrinsic  
274 excitability included depolarized onset and peak voltage of PICs and depolarized threshold for action  
275 potential firing, as shown in **Figure 3**. In voltage clamp, slowly depolarizing voltage ramps were used to  
276 measure PICs (typical leak subtracted traces shown in Fig3A). Voltage sensitivity is determined by  
277 measuring voltage at PIC onset and peak. Both PIC onset and peak were significantly depolarized in  
278 SOD1 interneurons, while amplitude of the PIC was unchanged. Depolarizing current ramps were used  
279 to measure the input-output relationship of the neurons in current clamp. Inhibitory interneurons from  
280 SOD1 mice were found to have significantly higher threshold voltage than WT interneurons (Fig 3E-F).  
281 This shift is likely driven by changes in PICs. Interestingly, despite PIC and threshold changes, the current  
282 at firing onset, or I-ON, was not significantly greater in SOD1 interneurons ( $p = 0.15$ ), similar to the  
283 current at firing offset, or I-OFF ( $p = 0.07$ ) perhaps due to smaller somata in SOD1 interneurons. The AHP  
284 also differed in SOD1 interneurons. The duration at half AHP amplitude was shorter in SOD1 neurons, as  
285 shown in Fig 3H-I. Amplitude of the AHP was unchanged. While changes in the PIC and threshold  
286 indicate less excitability in SOD1 interneurons, the shortened AHP suggests an increased ability to fire at  
287 higher rates in SOD1 interneurons, a property that is associated with increased excitability. However, no  
288 changes in firing rates were detected in SOD1 interneurons. All other properties were found to be  
289 similar in SOD1 and WT glycinergic interneurons, including maximum firing rates, sag/rebound currents  
290 ( $I_H$ ), action potential parameters and membrane properties (see **Table 2** for all electrical properties). See  
291 discussion for further interpretation of these findings.

292

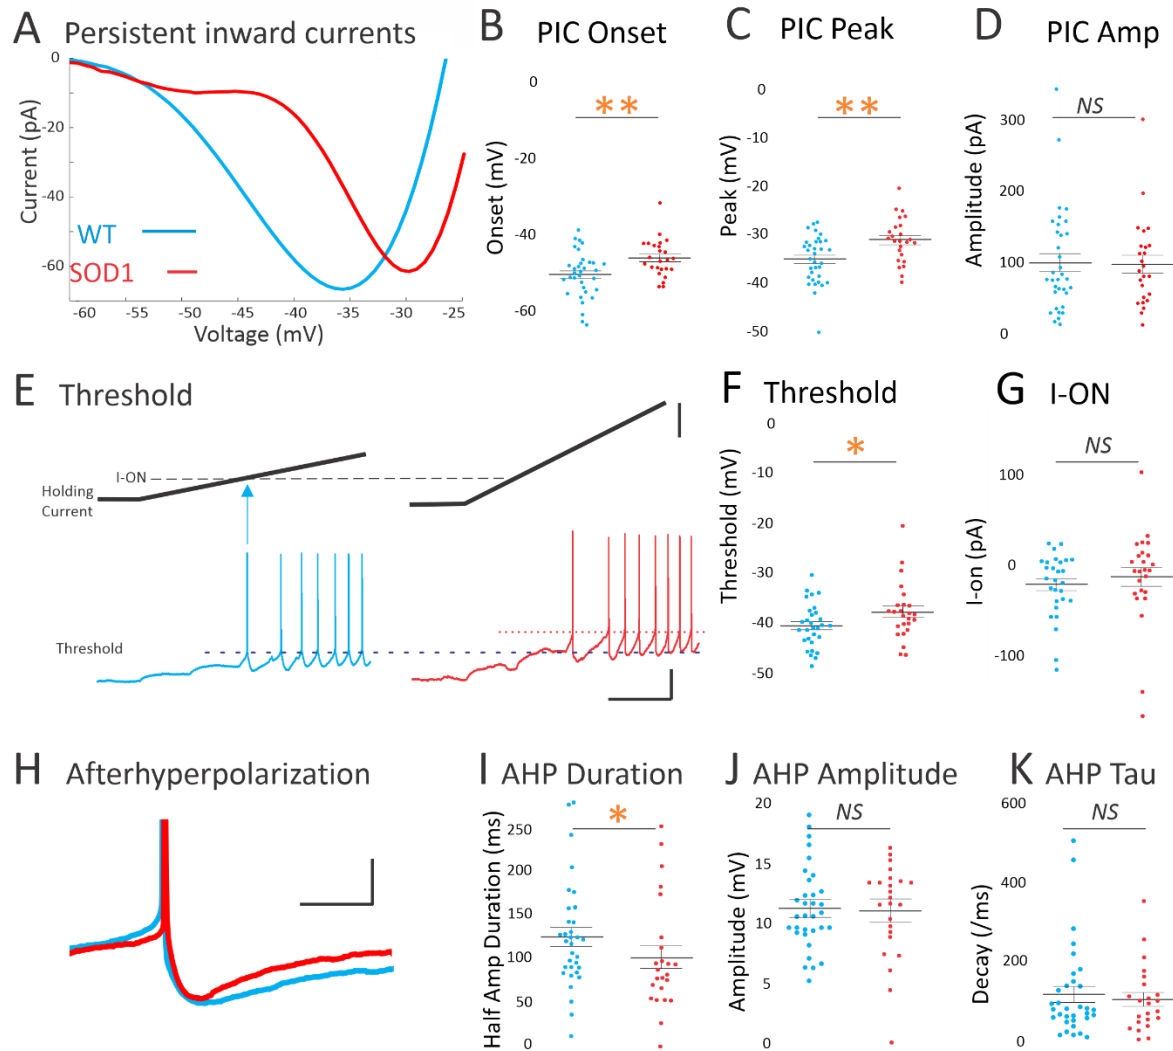

293

**Figure 3: Electrophysiology of SOD1 glycinergic interneurons.** The most prominent difference in SOD1 interneurons was the shift in voltage dependence of PICs and threshold. **(A)** Representative, leak-subtracted current-voltage relationship of PICs from WT (P8) and SOD1 (P6) interneurons. **(B-D)** Mean onset, peak and amplitude of PICs in WT (blue symbols on left) and SOD1 interneurons (red symbols on right). **(E-F)** Threshold voltage (action potentials evoked with current ramps as shown) was depolarized in SOD1 interneurons (compare dotted lines indicating threshold). Starting potential for both interneurons was -65mV. The current at firing onset (I-ON) was not significantly different as shown in **G**. **(H)** The AHP in SOD1 interneurons was shorter, as shown by the smaller mean duration at half amplitude in a representative P8 WT and P7 SOD1 interneuron and cumulative data in **I**. Neither the AHP amplitude nor the AHP decay time constant, tau, were significantly altered in SOD1 glycinergic interneurons, as shown in **J-K**. Vertical scale bars in **E**: top = 50pA, and bottom = 20mV. Horizontal scale bar in **E** = 0.5s and all scale bars apply to both left and right panels. Vertical scale bar in **H** = 10mV (APs were truncated from image), and horizontal scale bar = 50ms. Significance denoted with \* indicates  $p \leq 0.05$ ; \*\* indicates  $p < 0.01$ .

294

295

**Table 2:** Electrophysiological properties of GlyT2-GFP+ interneurons in WT and SOD1 animals.

| Parameters                              | Groups         |                 | p                  |
|-----------------------------------------|----------------|-----------------|--------------------|
|                                         | WT (Mean ± SE) | SOD (Mean ± SE) |                    |
|                                         | N = 34         | N = 25          |                    |
| Resting membrane potential (mV)         | -46.7 ± 1.1    | -45.7 ± 1.4     | 0.524 <sup>K</sup> |
| Capacitance (pF)                        | 66 ± 7         | 55 ± 5          | 0.529 <sup>K</sup> |
| Input resistance (MΩ)                   | 295 ± 32       | 299 ± 41        | 0.794 <sup>K</sup> |
| <b>PIC properties</b>                   |                |                 |                    |
| PIC onset (mV)                          | -50.5 ± 1.0    | -46.2 ± 1.0**   | 0.004              |
| PIC peak (mV)                           | -35.1 ± 0.8    | -31.2 ± 0.9**   | 0.003              |
| PIC amplitude (pA)                      | 100 ± 13       | 97 ± 12         | 0.890 <sup>K</sup> |
| Normalized PIC (pA/pF)                  | 1.79 ± 0.24    | 1.92 ± 0.22     | 0.226 <sup>K</sup> |
| <b>Firing properties</b>                |                |                 |                    |
| Inst firing freq range max (Hz)         | 112 ± 8        | 113 ± 8         | 0.961              |
| Steady state firing freq range min (Hz) | 6 ± 0.4        | 6 ± 0.7         | 0.453 <sup>K</sup> |
| I-ON (pA)                               | -55 ± 23       | -14 ± 11        | 0.148 <sup>K</sup> |
| I-OFF (pA)                              | 14 ± 14        | 36 ± 14         | 0.074 <sup>K</sup> |
| Δ I (pA)                                | 70 ± 14        | 50 ± 10         | 0.331 <sup>K</sup> |
| <b>AP properties</b>                    |                |                 |                    |
| AP overshoot past 0 (mV)                | 20.0 ± 1.7     | 21.4 ± 1.6      | 0.553              |
| AP duration at half peak (ms)           | 1.53 ± 0.09    | 1.48 ± 0.08     | 0.944              |
| AP rate of rise (V/s)                   | 87 ± 5         | 83 ± 3          | 0.428 <sup>K</sup> |
| AP rate of fall (V/s)                   | 45 ± 3         | 43 ± 2          | 0.924 <sup>K</sup> |
| Threshold on ramp (mV)                  | -40.6 ± 0.8    | -37.9 ± 1.1*    | 0.052 <sup>K</sup> |
| Threshold on step (mV)                  | -47.3 ± 0.8    | -45.1 ± 1.3     | 0.199 <sup>K</sup> |
| <b>AHP properties</b>                   |                |                 |                    |
| AHP amplitude (mV)                      | 11.2 ± 0.6     | 11.0 ± 0.8      | 0.704 <sup>K</sup> |
| AHP duration at half amplitude (s)      | 0.124 ± 0.010  | 0.101 ± 0.013*  | 0.045 <sup>K</sup> |
| AHP tau (s <sup>-1</sup> )              | 0.117 ± 0.020  | 0.105 ± 0.017   | 0.980 <sup>K</sup> |
| <b>I<sub>H</sub> properties</b>         |                |                 |                    |
| Hyperpolarizing Sag (%)                 | 32 ± 3         | 32 ± 4          | 0.537 <sup>K</sup> |
| Depolarizing Rebound (%)                | 17 ± 3         | 19 ± 5          | 0.536 <sup>K</sup> |

Significance denoted with \* indicates  $p \leq 0.05$ ; \*\* indicates  $p < 0.01$ .

<sup>K</sup> Indicates Kruskal-Wallis Test for nonparametric distributions; all others were ANOVA analysis.

296

297



298 **Regional analysis of glycinergic interneurons**

299 Since ventral glycinergic interneurons are not a homogenous population, we tested for regional  
300 differences. Interneurons were divided into three groups based on location 1) the “ventral RC region”:  
301 within 100  $\mu\text{m}$  of the ventral white matter where Renshaw cells are located, 2) lamina IX, and 3) the  
302 “intermediate region”: ventral horn region including lamina VII and VIII, excluding the previous two  
303 regions. These regions are represented in **Figure 4**. The first region corresponds to the location of RCs  
304 (but could contain other types of glycinergic interneurons). The second region contains interneurons  
305 that are interspersed with the MNs within the motor pools, likely to be composed of premotor  
306 interneurons (more on this in the discussion). The third region contains interneurons that are a mix of  
307 premotor interneurons and other classes of ventral interneurons. There was overlap of the first two  
308 regions, so interneurons within the ventral most 100  $\mu\text{m}$  that also were located within motor pools were  
309 included in both the ventral RC region and lamina IX, as shown in open circles in figure 4.

310

311

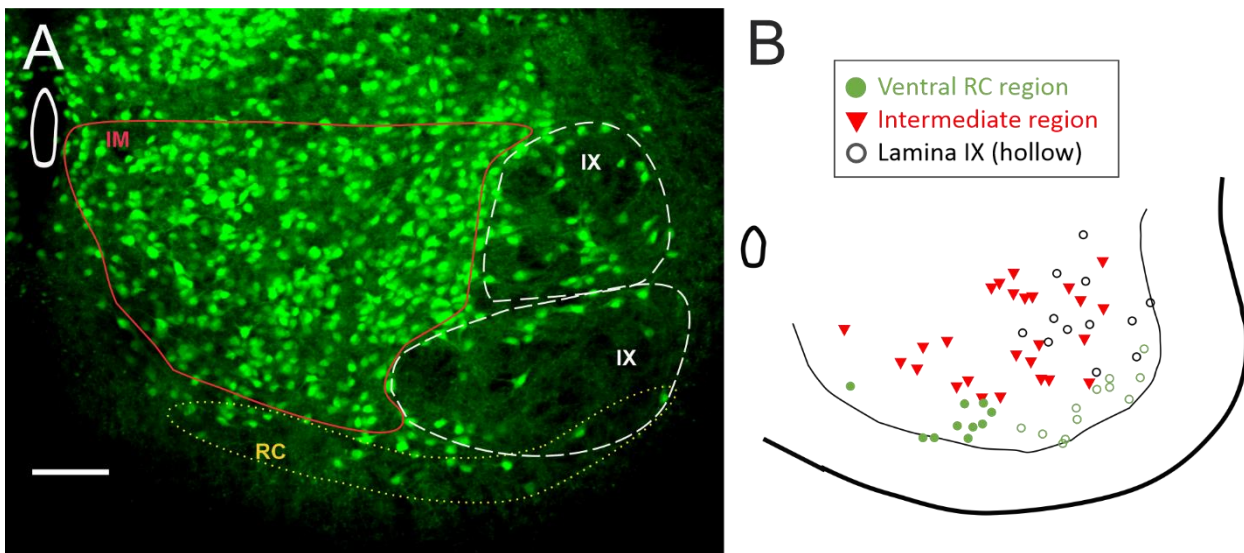

**Figure 4: Regional divisions of interneurons.** (A) Three regions were used for analysis of regional differences in glycinergic interneurons. (B) Map of the patched interneurons coded for regions. Ventral region with RC cells (green circles) overlapped with lamina IX (hollow circles). The remaining interneurons that were not within the RC region or lamina IX were grouped into an intermediate region of lamina VII and VIII (red triangles). Scale bar in A = 100  $\mu\text{m}$ .

### *GlyT2 interneurons in Ventral RC region*

312

313 Within the ventral region where RCs are located, we found that glycinergic SOD1 interneurons there  
314 showed the most significant changes in both electrophysiology and morphology. In patch clamped  
315 interneurons from this region (N = 8 WT from 7 mice and 13 SOD1 from 9 mice), there was a significant  
316 depolarization in PIC onset and peak in glycinergic SOD1 interneurons compared to WT interneurons in  
317 the same location. Additionally, primary dendrites were found to be longer and larger in volume and  
318 surface area in SOD1 interneurons in the ventral-most 100  $\mu\text{m}$ . Unpatched GlyT2+ SOD1 interneurons in  
319 this region (129 WT interneurons from 8 WT mice and 168 SOD1 interneurons from 9 SOD1 mice),  
320 analyzed from fixed spinal cords were smaller than WT glycinergic interneurons. These changes  
321 (summarized in **Figure 5** and **Table 3**) show that glycinergic neurons in the region where RCs are located  
322 are very affected by the SOD1 mutation. For example, primary dendrites of neurons in this region were  
323 more altered more significantly than glycinergic interneurons within the entire ventral horn (compare  
324 primary dendrite statistics in Tables 1 and 3).

### *GlyT2 interneurons in Lamina IX*

325  
326 The SOD1 interneurons located in lamina IX, intermixed with MNs were modestly altered in excitability  
327 and morphology. As shown in **Figure 6** and **Table 4**, PIC onset was depolarized in SOD1 interneurons in  
328 this region, compared to interneurons in this region from WT mice (n = 14 WT interneurons from 8 mice  
329 and 11 SOD1 interneurons from 9 mice). Longer total length of primary dendrites was also found in  
330 patched interneurons in this region. Within the larger number of unpatched interneurons (345 WT  
331 interneurons from 7 WT mice and 306 SOD1 interneurons from 8 SOD1 mice), SOD1 interneurons were  
332 found to have smaller somata than WT interneurons.

333

### *GlyT2 interneurons in the Intermediate region*

334

335 The third regional group of glycinergic interneurons was defined as the intermediate region. These  
336 interneurons were located in laminae VII and VIII, excluding the ventral 100  $\mu\text{m}$  and lamina IX. Within  
337 this area, 16 WT and 8 SOD1 interneurons were patched from 11 WT and 5 SOD1 mice respectively, and  
338 2077 unpatched interneurons were analyzed from 9 WT mice and 1113 unpatched SOD1 interneurons  
339 from 9 SOD1 mice. As shown in **Figure 7** and **Table 5**, only PIC peak was significantly depolarized. In  
340 unpatched neurons from this region, soma size was significantly smaller in SOD1 interneurons, similar to  
341 the other two regions.

342

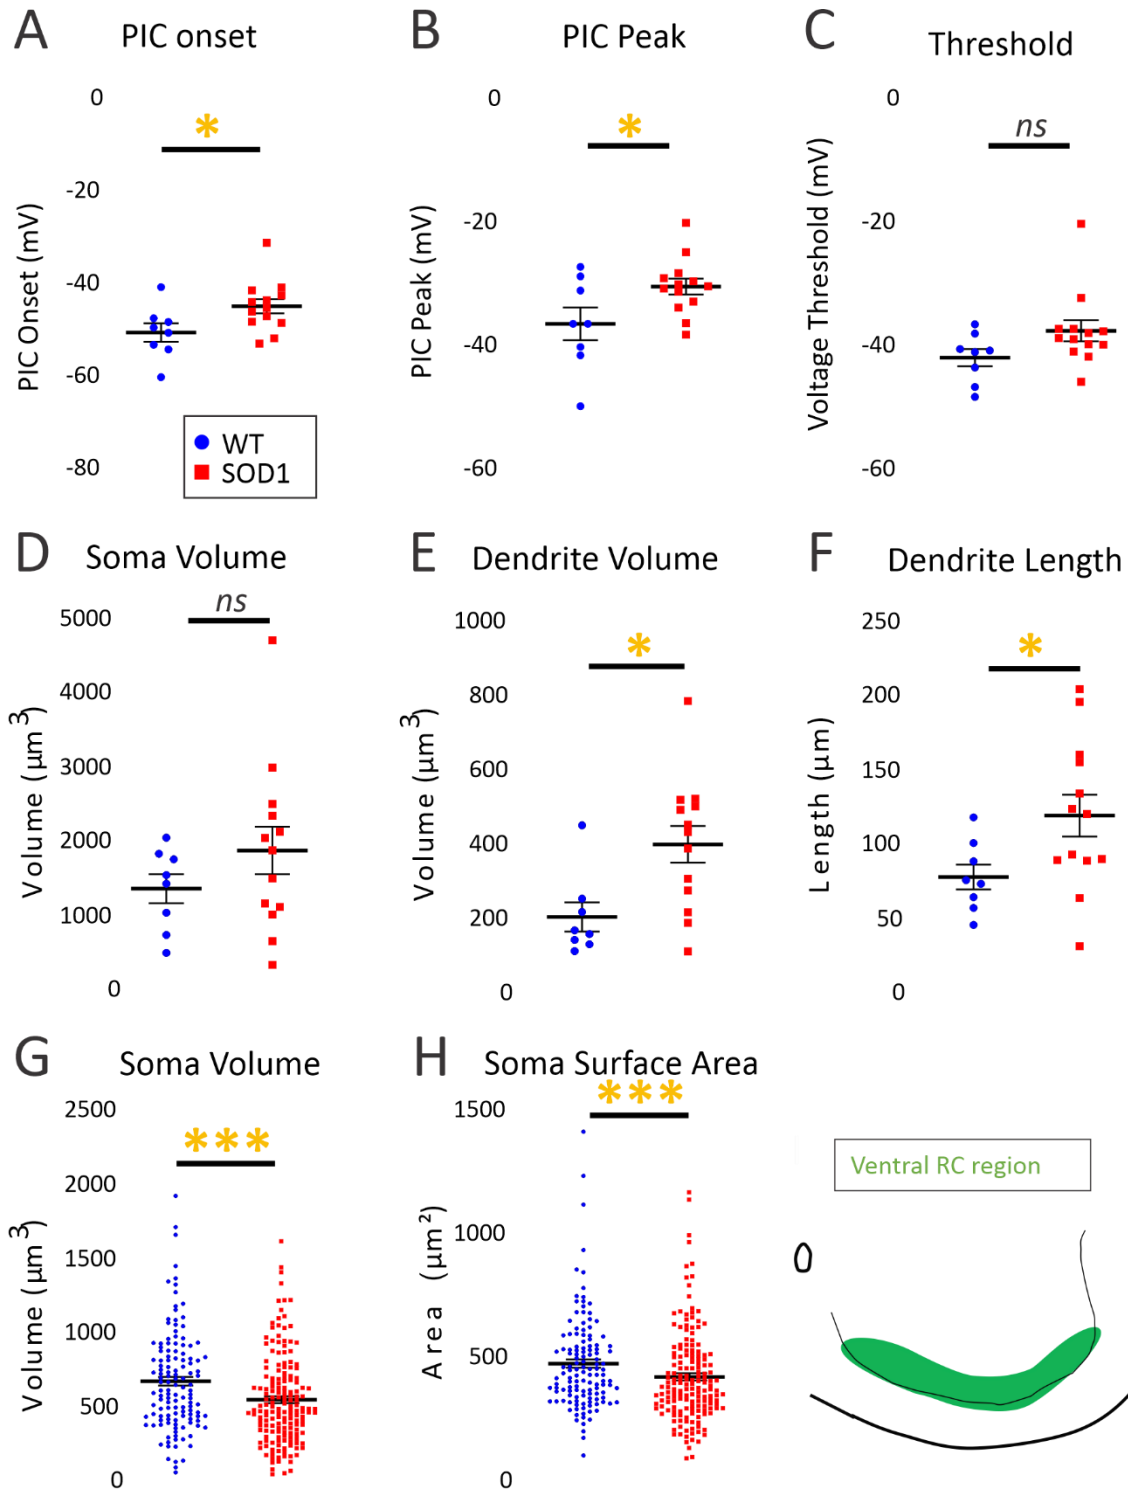

**Figure 5: PICs were depolarized in SOD1 GlyT2 interneurons in the ventral RC region.** Both onset (A) and peak (B) of the PIC were depolarized. Threshold was unchanged (C). Soma volume of patched neurons (D) was unchanged, though SOD1 primary dendrites had more total volume (E) and length (F) per cell. Larger numbers of unpatched neurons showed smaller soma volume (G) and surface area (H) in SOD1 interneurons than WT, in RC region. Significance denoted with \* indicates  $p \leq 0.05$ , \*\* indicates  $p \leq 0.01$ .

344

**Table 3:** Electrophysiological properties of WT and SOD1 GlyT2-GFP+ interneurons in ventral RC region.

|                                                          | WT (Mean ± SE)   | SOD (Mean ± SE)    | <i>p</i>           |
|----------------------------------------------------------|------------------|--------------------|--------------------|
|                                                          | N = 8            | N = 13             |                    |
| PIC Onset (mV)                                           | -51.3 (± 2.0)    | -45.6 (± 1.5) *    | 0.036              |
| PIC Peak (mV)                                            | -36.8 (± 2.6)    | -30.8 (± 1.3) *    | 0.034              |
| PIC Amplitude (pA)                                       | 77.2 (± 15.6)    | 114.9 (± 19.7)     | 0.218 <sup>K</sup> |
| I-ON (pA)                                                | -65.6 (± 39.0)   | -18.1 (± 14.2)     | 0.096 <sup>K</sup> |
| I-OFF (pA)                                               | -31.9 (± 20.5)   | 6.9 (± 15.0)       | 0.060 <sup>K</sup> |
| Δ I (pA)                                                 | 36.3 (± 19.4)    | 25.1 (± 6.8)       | 0.717 <sup>K</sup> |
| Threshold on ramp (mV)                                   | -42.4 (± 1.4)    | -38.0 (± 1.7)      | 0.070 <sup>K</sup> |
| Threshold on step (mV)                                   | -47.0 (± 1.1)    | -44.1 (± 1.6)      | 0.261 <sup>K</sup> |
| AHP amplitude (mV)                                       | 11.6 (± 1.4)     | 11.4 (± 1.0)       | 0.921              |
| AHP duration at half amplitude (s)                       | 0.128 (± 0.027)  | 0.117 (± 0.016)    | 0.469 <sup>K</sup> |
| AHP tau (s <sup>-1</sup> )                               | 0.117 (± 0.050)  | 0.109 (± 0.020)    | 0.346 <sup>K</sup> |
| <b>Morphology of Patched interneurons in RC region</b>   |                  |                    |                    |
|                                                          | N = 8            | N = 13             |                    |
| <b>Soma</b>                                              |                  |                    |                    |
| Soma Surface Area (μm <sup>2</sup> )                     | 589.4 (± 59.0)   | 700.0 (± 79.1)     | 0.334              |
| Soma Volume (μm <sup>3</sup> )                           | 1326.0 (± 195.4) | 1841.0 (± 318.8)   | 0.253              |
| <b>Primary Dendrites</b>                                 |                  |                    |                    |
| Total Dendrite Length (μm)                               | 76.4 (± 8.4)     | 117.7 (± 14.0) *   | 0.044              |
| Average Dendrite Length (μm)                             | 26.2 (± 2.7)     | 35.2 (± 3.9)       | 0.161 <sup>K</sup> |
| Total Dendrite Surface Area (μm <sup>2</sup> )           | 407.6 (± 57.3)   | 680.7 (± 65.7) *   | 0.010 <sup>K</sup> |
| Average Dendrite Surface Area (μm <sup>2</sup> )         | 137.4 (± 14.5)   | 206.0 (± 21.2) *   | 0.025 <sup>K</sup> |
| Total Dendrite Volume (μm <sup>3</sup> )                 | 196.3 (± 38.9)   | 391.5 (± 49.7) *   | 0.013 <sup>K</sup> |
| Average Dendrite Volume (μm <sup>3</sup> )               | 65.0 (± 9.6)     | 119.6 (± 16.3) *   | 0.016 <sup>K</sup> |
| <b>Morphology of Unpatched interneurons in RC region</b> |                  |                    |                    |
|                                                          | N = 129          | N = 168            |                    |
| Soma Surface Area (μm <sup>2</sup> )                     | 466.2 (± 17.0)   | 412.3 (± 14.4) *** | 0.000 <sup>K</sup> |
| Soma Volume (μm <sup>3</sup> )                           | 657.2 (± 29.7)   | 532.8 (± 23.2) *** | 0.000 <sup>K</sup> |

Significance denoted with \* indicates  $p \leq 0.05$ ; \*\*\* indicates  $p < 0.001$ .

<sup>K</sup> Indicates Kruskal-Wallis Test for nonparametric distributions; all others were ANOVA analysis.

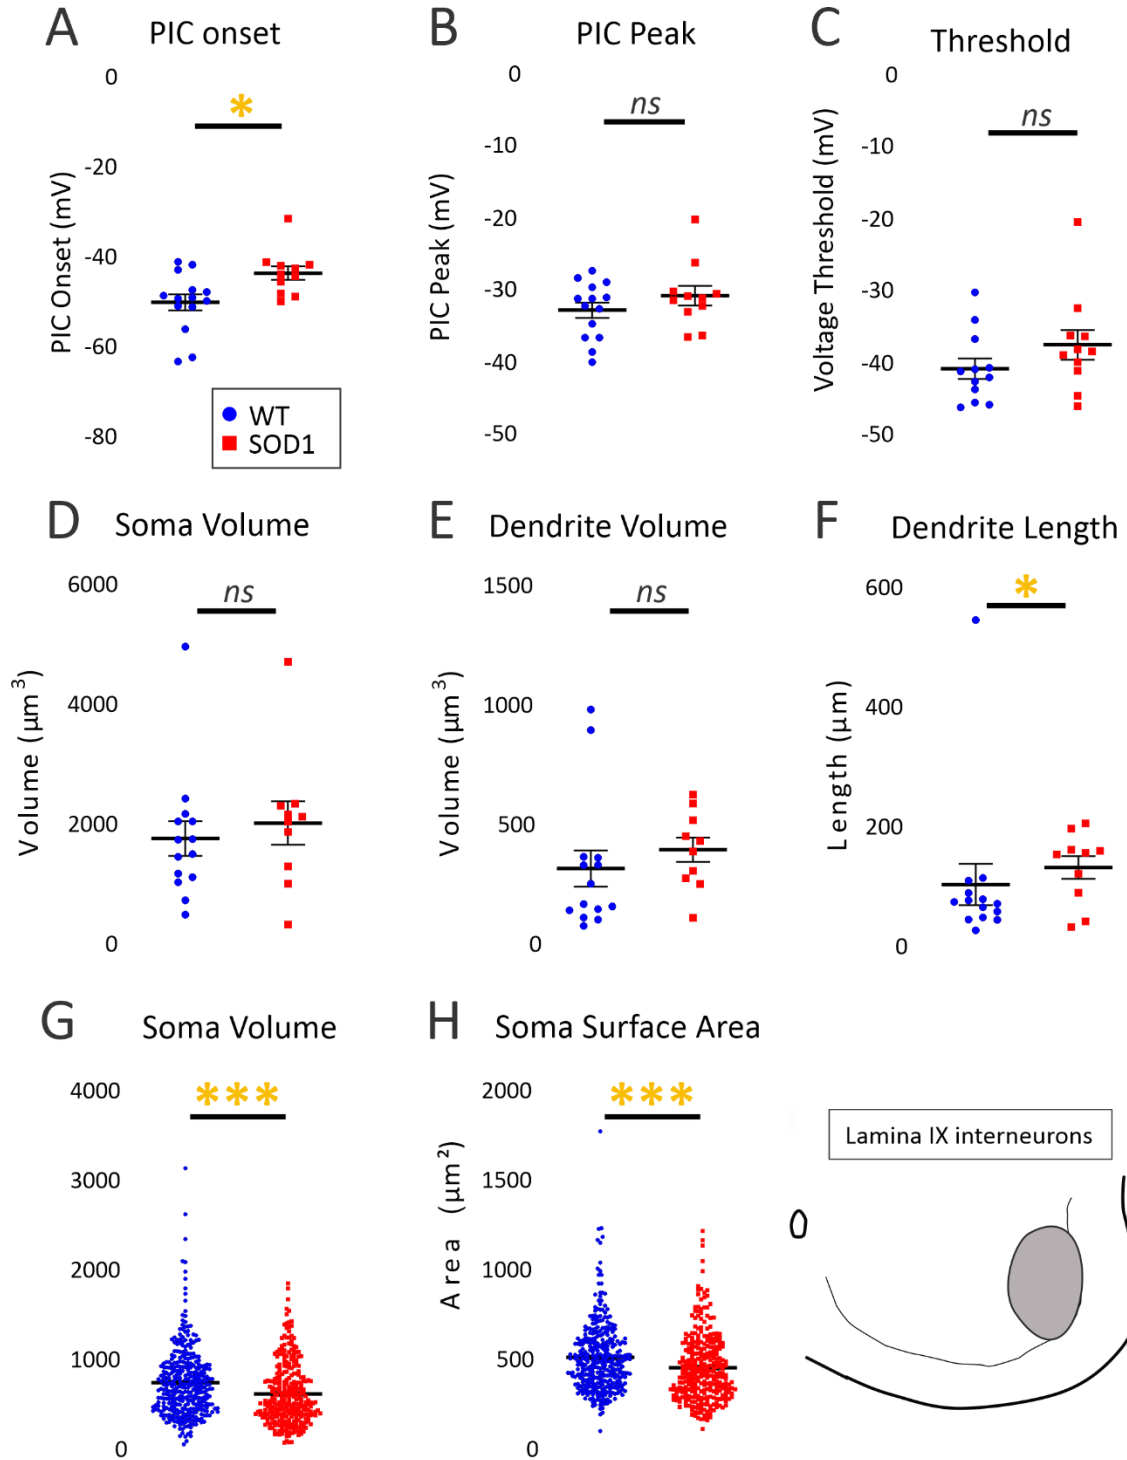

**Figure 6: Electrophysiology and morphology was altered in glycinergic SOD1 interneurons in lamina IX.** PIC onset (A) was depolarized in SOD1 interneurons without changes in PIC peak (B) and voltage threshold (C). Soma (D) and primary dendrite (E) total volume was unchanged, but primary dendrite total length was longer (F) than in WT interneurons. Unpatched glycinergic neurons showed smaller soma volume (G) and surface area (H) in SOD1 interneurons than WT in Lamina IX. Significance denoted with \* indicates  $p \leq 0.05$ , \*\*\* indicates  $p \leq 0.001$ .

346

347

**Table 4:** Electrophysiological properties of WT and SOD1 GlyT2-GFP+ interneurons in lamina IX.

|                                                          | WT (Mean ± SE)   | SOD (Mean ± SE)    | <i>p</i>           |
|----------------------------------------------------------|------------------|--------------------|--------------------|
|                                                          | N = 14           | N = 11             |                    |
| PIC Onset (mV)                                           | -50.5 (± 1.8)    | -44.0 (± 1.5) *    | 0.013              |
| PIC Peak (mV)                                            | -33.1 (± 1.1)    | -31.1 (± 1.4)      | 0.248              |
| PIC Amplitude (pA)                                       | 115.9 (± 21.7)   | 98.1 (± 22.8)      | 0.412 <sup>K</sup> |
| I-ON (pA)                                                | -78.3 (± 47.0)   | -11.3 (± 19.3)     | 0.155 <sup>K</sup> |
| I-OFF (pA)                                               | 21.9 (± 27.9)    | 22.2 (± 22.0)      | 0.250 <sup>K</sup> |
| Δ I (pA)                                                 | 101.7 (± 73.1)   | 33.4 (± 9.0)       | 0.701              |
| Threshold on ramp (mV)                                   | -41.1 (± 1.4)    | -37.8 (± 2.1)      | 0.193              |
| Threshold on step (mV)                                   | -47.4 (± 1.1)    | -43.9 (± 2.2)      | 0.112 <sup>K</sup> |
| AHP amplitude (mV)                                       | 11.4 (± 1.0)     | 10.2 (± 1.0)       | 0.421              |
| AHP duration at half amplitude (s)                       | 0.125 (± 0.019)  | 0.094 (± 0.019)    | 0.139 <sup>K</sup> |
| AHP tau (s <sup>-1</sup> )                               | 0.129 (± 0.032)  | 0.076 (± 0.032)    | 0.274 <sup>K</sup> |
| <b>Morphology of Patched interneurons in lamina IX</b>   |                  |                    |                    |
|                                                          | N = 14           | N = 10             |                    |
| <b>Soma</b>                                              |                  |                    |                    |
| Soma Surface Area (μm <sup>2</sup> )                     | 702.6 (± 64.8)   | 734.3 (± 89.8)     | 0.771              |
| Soma Volume (μm <sup>3</sup> )                           | 1731.2 (± 288.6) | 1988.8 (± 363.2)   | 0.412 <sup>K</sup> |
| <b>Primary Dendrites</b>                                 |                  |                    |                    |
| Total Dendrite Length (μm)                               | 100.8 (± 34.6)   | 129.3 (± 18.9) *   | 0.046 <sup>K</sup> |
| Average Dendrite Length (μm)                             | 29.3 (± 6.5)     | 36.7 (± 5.0)       | 0.069 <sup>K</sup> |
| Total Dendrite Surface Area (μm <sup>2</sup> )           | 544.8 (± 140.1)  | 721.5 (± 92.8)     | 0.089 <sup>K</sup> |
| Average Dendrite Surface Area (μm <sup>2</sup> )         | 164.0 (± 26.3)   | 208.0 (± 25.2)     | 0.128 <sup>K</sup> |
| Total Dendrite Volume (μm <sup>3</sup> )                 | 308.8 (± 75.5)   | 387.6 (± 51.0)     | 0.114 <sup>K</sup> |
| Average Dendrite Volume (μm <sup>3</sup> )               | 94.9 (± 17.5)    | 113.3 (± 14.5)     | 0.178 <sup>K</sup> |
| <b>Morphology of Unpatched interneurons in lamina IX</b> |                  |                    |                    |
|                                                          | N = 345          | N = 306            |                    |
| Soma Surface Area (μm <sup>2</sup> )                     | 505.9 (± 10.4)   | 448.3 (± 10.7) *** | 0.000 <sup>K</sup> |
| Soma Volume (μm <sup>3</sup> )                           | 732.0 (± 21.1)   | 605.1 (± 19.6) *** | 0.000 <sup>K</sup> |

Significance denoted with \* indicates  $p \leq 0.05$ ; \*\*\* indicates  $p < 0.001$ .

<sup>K</sup> Indicates Kruskal-Wallis Test for nonparametric distributions; all others were ANOVA analysis.

348

349

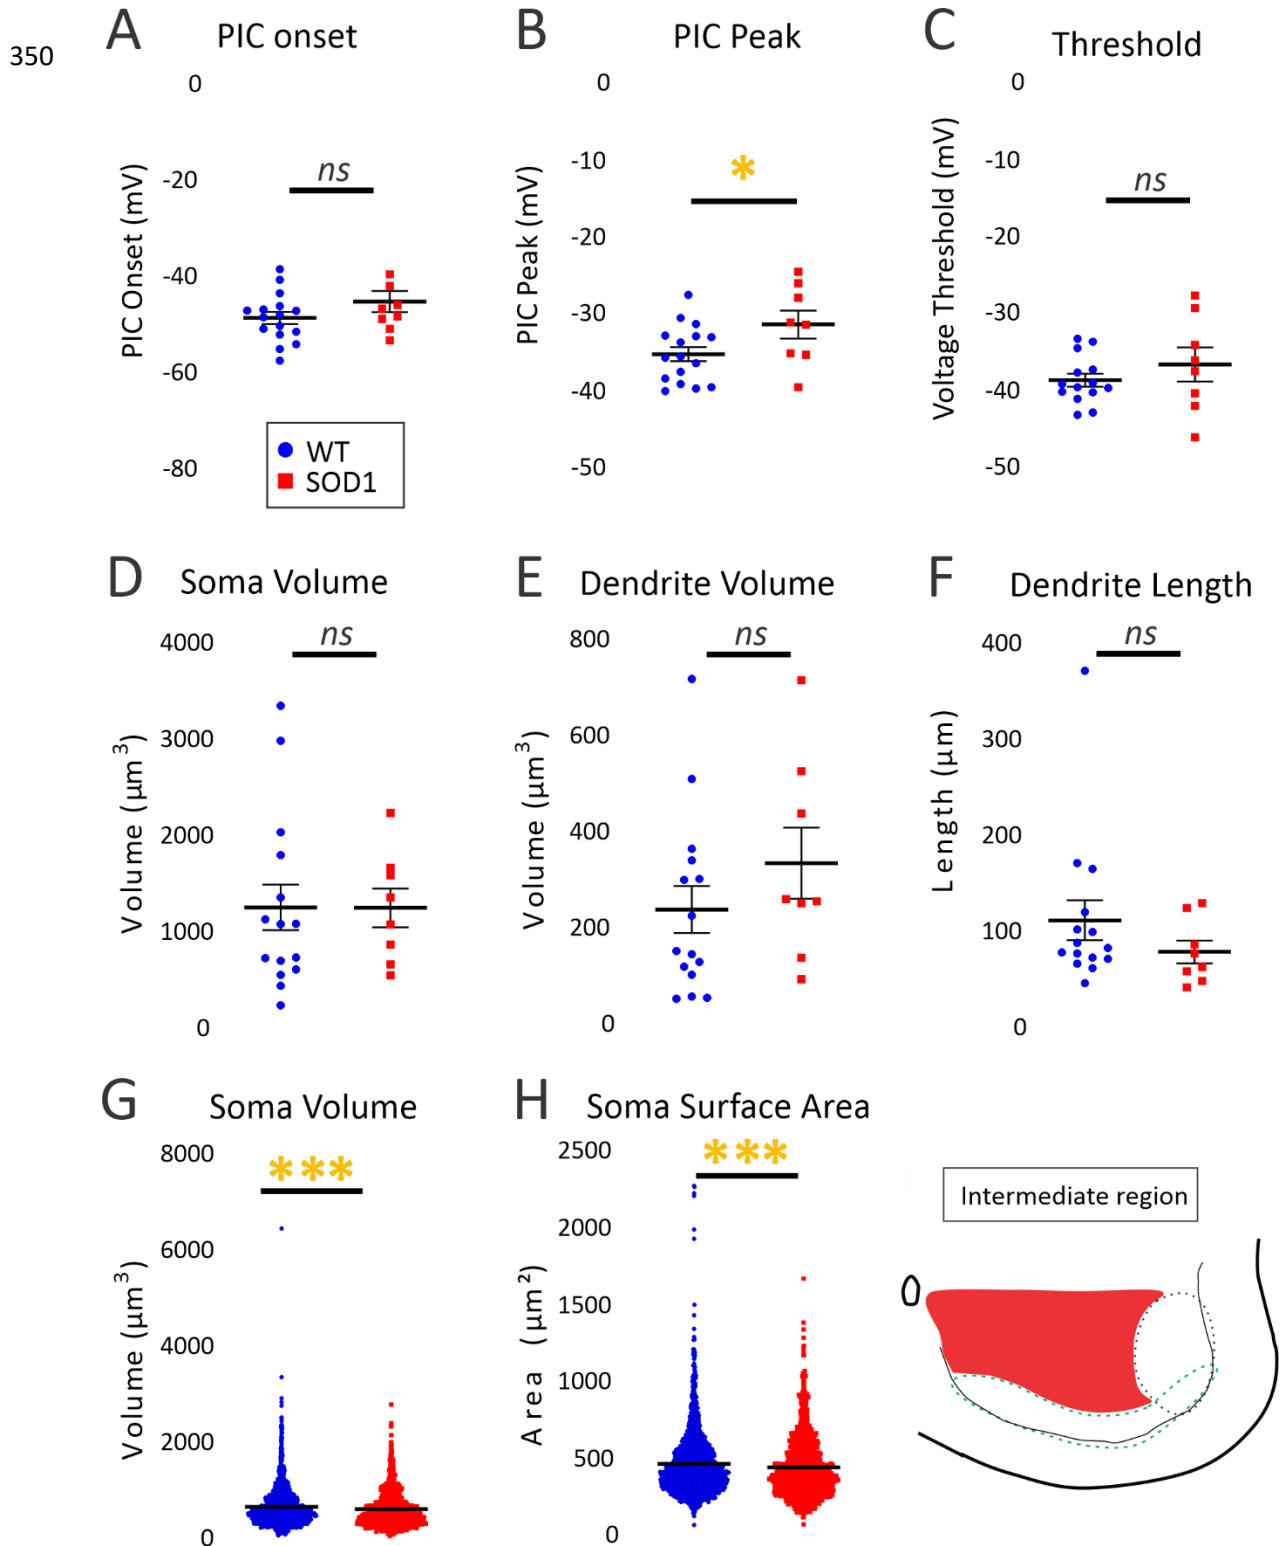

**Figure 7: Morphology was altered in SOD1 interneurons in the intermediate regions of laminae VII and VIII.** PIC onset (A) was not significantly different in SOD1 interneurons, though PIC peak (B) was depolarized. Voltage threshold (C) was not affected. Morphology of soma (D) and dendrites (E and F) in patched SOD1 interneurons were unchanged, however larger numbers of unpatched neurons showed smaller soma volume (G) and surface area (H) in SOD1 interneurons than in WT, in laminae VII and VIII. Significance denoted with \* indicates  $p \leq 0.05$ , \*\*\* indicates  $p \leq 0.001$ .

351

**Table 5:** Electrophysiological properties of WT and SOD1 GlyT2-GFP+ interneurons in Intermediate Region of lamina VII and VIII.

| Parameters                                                           | Groups           |                    | p                  |
|----------------------------------------------------------------------|------------------|--------------------|--------------------|
|                                                                      | WT (Mean ± SE)   | SOD (Mean ± SE)    |                    |
|                                                                      | N = 16           | N = 8              |                    |
| PIC Onset (mV)                                                       | -49.0 (± 1.3)    | -47.4 (± 1.6)      | 0.435              |
| PIC Peak (mV)                                                        | -35.5 (± 0.9)    | -31.7 (± 1.8) *    | 0.046              |
| PIC Amplitude (pA)                                                   | 92.1 (± 16.7)    | 77.0 (± 17.7)      | 0.881 <sup>K</sup> |
| I-ON (pA)                                                            | -18.2 (± 11.6)   | -16.5 (± 19.1)     | 0.776 <sup>K</sup> |
| I-OFF (pA)                                                           | 20.9 (± 12.2)    | 73.9 (± 26.7)      | 0.101 <sup>K</sup> |
| Δ I (pA)                                                             | 39.0 (± 9.1)     | 69.1 (± 24.4)      | 0.076 <sup>K</sup> |
| Threshold on ramp (mV)                                               | -38.9 (± 0.83)   | -37.0 (± 2.2)      | 0.525 <sup>K</sup> |
| Threshold on step (mV)                                               | -46.7 (± 1.2)    | -46.3 (± 2.4)      | 0.490 <sup>K</sup> |
| AHP amplitude (mV)                                                   | 11.3 (± 0.8)     | 10.5 (± 2.0)       | 0.658              |
| AHP duration at half amplitude (s)                                   | 0.116 (± 0.011)  | 0.095 (± 0.030)    | 0.267 <sup>K</sup> |
| AHP tau (s <sup>-1</sup> )                                           | 0.119 (± 0.032)  | 0.127 (± 0.051)    | 1.000 <sup>K</sup> |
| <b>Morphology of Patched interneurons in laminae VII and VIII.</b>   |                  |                    |                    |
|                                                                      | N = 15           | N = 8              |                    |
| <b>Soma</b>                                                          |                  |                    |                    |
| Soma Surface Area (μm <sup>2</sup> )                                 | 573.5 (± 62.9)   | 558.5 (± 56.7)     | 0.699 <sup>K</sup> |
| Soma Volume (μm <sup>3</sup> )                                       | 1232.3 (± 237.4) | 1228.2 (± 201.6)   | 0.776 <sup>K</sup> |
| <b>Primary Dendrites</b>                                             |                  |                    |                    |
| Total Dendrite Length (μm)                                           | 109.7 (± 20.7)   | 76.7 (± 11.7)      | 0.220 <sup>K</sup> |
| Average Dendrite Length (μm)                                         | 30.2 (± 4.8)     | 24.5 (± 2.7)       | 0.606 <sup>K</sup> |
| Total Dendrite Surface Area (μm <sup>2</sup> )                       | 505.5 (± 83.0)   | 513.7 (± 93.6)     | 0.699 <sup>K</sup> |
| Average Dendrite Surface Area (μm <sup>2</sup> )                     | 138.9 (± 18.7)   | 168.0 (± 30.1)     | 0.366 <sup>K</sup> |
| Total Dendrite Volume (μm <sup>3</sup> )                             | 233.9 (± 48.8)   | 330.4 (± 74.1)     | 0.272 <sup>K</sup> |
| Average Dendrite Volume (μm <sup>3</sup> )                           | 64.1 (± 11.8)    | 108.8 (± 24.8)     | 0.071 <sup>K</sup> |
| <b>Morphology of Unpatched interneurons in laminae VII and VIII.</b> |                  |                    |                    |
|                                                                      | N = 2077         | N = 1113           |                    |
| Soma Surface Area (μm <sup>2</sup> )                                 | 451.7 (± 4.6)    | 428.3 (± 5.9) ***  | 0.000 <sup>K</sup> |
| Soma Volume (μm <sup>3</sup> )                                       | 624.9 (± 9.0)    | 575.3 (± 11.4) *** | 0.000 <sup>K</sup> |

Significance denoted with \* indicates  $p \leq 0.05$ ; \*\*\* indicates  $p < 0.001$ .

<sup>K</sup> Indicates Kruskal-Wallis Test for nonparametric distributions; all others were ANOVA analysis.

352

353



354 Taken together, these results show that glycinergic interneurons are profoundly affected by the SOD1  
355 mutation and are altered very early in life in both electrophysiology and morphology. These changes  
356 appear to be more severe in very ventrally located interneurons.

## 357 **Discussion**

358  
359 This study shows for the first time that glycinergic interneurons are depressed in excitability in the SOD1  
360 mouse model and may be contributing to ALS pathology. Alterations in both morphology and excitability  
361 of glycinergic interneurons occur at a very early, presymptomatic stage, and are particularly prominent  
362 those interneurons located within 100  $\mu\text{m}$  of the ventral white matter. We speculate that these shifts in  
363 interneuron excitability and morphology could have functional consequences that alter inhibition of  
364 MNs, modify motor output, and could even provide an early biomarker of ALS.

### 366 *Intrinsic and synaptic hyperexcitability*

367  
368 A core issue this study brings to light is potential long-term disruption to the balance of excitatory and  
369 inhibitory synaptic transmission in ALS. Spinal cord and cortex both show an imbalance between  
370 excitatory and inhibitory synaptic transmission in SOD<sup>G93A</sup> mice (Avossa et al., 2006; Saba et al., 2016).  
371 Clinically, ALS patients show evidence of altered synaptic activity as well, including a reduction in  
372 inhibition. A reduction of glycinergic receptor binding in the anterior gray matter of the spinal cord  
373 (Hayashi et al., 1981; Whitehouse et al., 1983) has been demonstrated along with abnormal glycine and  
374 gamma amino butyric acid (GABA) levels in blood serum (Malessa et al., 1991; Niebroj-Dobosz and Janik,  
375 1999). Electrophysiology also suggests disruption in spinal inhibitory circuits in ALS patients (Raynor and  
376 Shefner, 1994; Shefner and Logigian, 1998; Sangari et al., 2016; Özyurt et al., 2020). An interesting  
377 question is whether the neurons are altered in excitability only within the motor circuit (i.e.,  
378 corticospinal neurons and the synaptically-connected spinal inhibitory and cholinergic interneurons, and  
379 MNs), or if disturbances are more widespread throughout the nervous system. In the spinal cord,  
380 interneurons that serve as conduits between vulnerable corticospinal and spinal MNs include cholinergic  
381 interneurons, Ia inhibitory interneurons and RCs. There is abundant evidence of disruption in these  
382 cholinergic, GABAergic and glycinergic synapses from animal models (Martin et al., 2007; Chang and  
383 Martin, 2009b; Pullen and Athanasiou, 2009; Hossaini et al., 2011; Herron and Miles, 2012; Casas et al.,  
384 2013; Wootz et al., 2013; Saxena et al., 2013; Milan et al., 2015; Dukkipati et al., 2016; Medelin et al.,

385 2016). Similarly, in the cortex, neurons that are not themselves vulnerable to neurodegeneration in ALS  
386 also exhibit altered excitability and morphology in a parallel time course to the vulnerable corticospinal  
387 neurons (Clark et al., 2017, 2018; Kim et al., 2017). The changes in excitability of other neuronal  
388 populations must contribute to the imbalance of both excitatory and inhibitory neurotransmission that  
389 has been clearly demonstrated in ALS patients and animal models.

390 A case for hyperexcitability and glutamate excitotoxicity in ALS pathogenesis has been more  
391 controversial. Altered intrinsic excitability has been consistently reported in both corticospinal  
392 projection neurons and spinal MNs, but these perturbations appear to fluctuate based on age/disease  
393 progression. Corticospinal projection neurons have increased firing and other signs of hyperexcitability  
394 during the first week of postnatal development (Pieri et al., 2009; Saba et al., 2016, 2019; Kim et al.,  
395 2017), but excitability is normal in young and adult pre-symptomatic ages (Kim et al., 2017; Saba et al.,  
396 2019), and may become hypoexcitable at the age of symptom onset (Saba et al., 2019). Similarly, spinal  
397 MNs show intrinsic hyperexcitability at very early (embryonic) stages (Kuo et al., 2004, 2005; Martin et  
398 al., 2013). At a postnatal age similar to the inhibitory interneurons in this study, spinal MNs do *not* have  
399 an altered threshold, rheobase or frequency-current relationship, though other abnormalities are  
400 present in PICs, action potential duration, AHP and dendritic Ca<sup>2+</sup> entry (Pambo-Pambo et al., 2009;  
401 Quinlan et al., 2011, 2015; Leroy et al., 2014). Thus, at the age studied here, *inhibitory interneurons are*  
402 *more disrupted in excitability than the vulnerable spinal MNs*. At symptom onset, MNs may finally  
403 succumb to hypoexcitability, though not all studies agree on this point (Delestrée et al., 2014; Martinez-  
404 Silva et al., 2018; Jensen et al., 2020). Notably, MNs derived from ALS patients' induced pluripotent stem  
405 cells also show initial hyperexcitability followed by hypoexcitability (Wainger et al., 2014; Devlin et al.,  
406 2015), and increasing excitability of MNs enhanced neuroprotection rather than neurodegeneration  
407 (Saxena et al., 2013). A unifying theme throughout the findings is that vulnerable MNs show excessive  
408 homeostatic gain in response to perturbation (Kuo et al., 2020), and not only excitability but other  
409 cellular properties fluctuate over the lifespan of the animal (Irvin et al., 2015). In light of that, whether  
410 inhibitory interneurons are less excitable at other ages should be explored in future studies to fully  
411 characterize their contribution to neurodegenerative processes.

412

#### 413 *Changes in neuron morphology*

414 In ALS models, altered morphology in spinal MNs occurs so early that it could be viewed as a deficit in  
415 normal development. Embryonically, SOD1 MNs have shorter projections but this is reversed during

416 postnatal development. At 1-2 weeks of age, SOD1 MNs begin to show more dendritic branching and  
417 larger soma sizes than WT MNs (Amendola and Durand, 2008; Filipchuk and Durand, 2012; Martin et al.,  
418 2013). Interestingly, this could be caused by lack of inhibitory input to MNs (Fogarty et al., 2016). SOD1  
419 spinal MNs remain larger than WT MNs through adulthood (Dukkipati et al., 2018). In contrast to the  
420 spinal MNs at this age, we found that SOD1 inhibitory interneurons had smaller soma size and yet had  
421 expanded dendritic surface area and volume of primary dendrites compared to WT glycinergic  
422 interneurons. This is reminiscent of changes in corticospinal neurons: presymptomatic corticospinal  
423 neurons also have increased arborization but with smaller soma diameters (Ozdinler et al., 2011; Saba et  
424 al., 2016). In both sporadic and familial ALS patients, postmortem tissue shows degeneration of apical  
425 dendrites in corticospinal neurons and smaller soma size (Genç et al., 2017). In SOD1 spinal interneurons  
426 in the present study, increased dendrite length, surface area and volume of primary dendrites was most  
427 prominent in the ventral interneurons in the RC region, while smaller soma sizes were found throughout  
428 the ventral horn. Altered neuronal size / arborization could alter the impact of other stressors (e.g.,  
429 proteostasis, metabolic deficits, intracellular transport).

430

#### 431 *After spike afterhyperpolarization*

432 The AHP can contribute to a neuron's firing rate such that a neuron with a large, long-lasting AHP will  
433 typically fire at a slower rate (typical of slow/type I MNs) than a neuron with small, fast-decaying AHP  
434 (typical of fast/type II MNs). In ALS patients, the AHP is shortened in MNs of patients with little force  
435 deficits and later elongated in patients with large force deficits (Piotrkiewicz and Hausmanowa-  
436 Petrusiewicz, 2011), which could reflect early changes in physiology of vulnerable fast MNs and later, the  
437 remaining, less-vulnerable population of slow MNs. Similarly, SOD1 mouse MNs show shorter AHPs  
438 early, and longer AHPs around symptom onset (Quinlan et al., 2011; Jensen et al., 2020). Here we show  
439 that AHP is shorter in duration in SOD1 interneurons very early in life. In the regional analysis, AHP  
440 parameters were not found to be significantly altered in any of the 3 regions, but it is possible this was  
441 due to a loss in statistical power in the smaller groups. We did not find concomitant changes in  
442 minimum or maximum firing rates in GlyT2 interneurons, so the physiological importance of the altered  
443 AHP duration in interneurons is unclear.

444

#### 445 *Inhibitory interneurons: Subtype specific effects*

446 The interneurons in this study were heterogenous, and based on their location and electrophysiology,  
447 they likely were composed of V1 and V2b interneurons including RCs, commissural interneurons (V2b  
448 interneurons), and Ia inhibitory interneurons, and perhaps inhibitory propriospinal interneurons (Willis  
449 and Willis, 1964; Restrepo et al., 2009; Bikoff et al., 2016; Flynn et al., 2017). Because of this  
450 heterogeneity, interneurons were separated into regions for further analysis, to examine more  
451 specifically which inhibitory interneurons were perturbed. Based on our regional analysis, interneurons  
452 in the ventral-most 100  $\mu\text{m}$  from white matter were altered the most in both excitability and  
453 morphology, with the most strongly depolarized PICs and larger primary dendrites, moreso than  
454 glycinergic interneurons within lamina IX and intermediate lamina VI and VII. Interneurons located in the  
455 region within 100  $\mu\text{m}$  from the ventral white matter likely contain more RCs based on the location  
456 (Siembab et al., 2010) and electrophysiological characteristics (Perry et al., 2015; Bikoff et al., 2016).  
457 Glycinergic interneurons located in lamina IX are reminiscent of the locomotor-related GABAergic  
458 interneurons characterized by Nishimaru and colleagues, which were located within the ventrolateral  
459 spinal cord, surrounded MNs and were active during locomotor activity (Nishimaru et al., 2011). Indeed  
460 these may be the same neurons: colocalization of GABA and glycine is entirely possible (Jonas et al.,  
461 1998; Allain et al., 2006). If the lamina IX interneurons are indeed locomotor-related, even a modest  
462 dampening of excitability observed here in SOD1 mice could contribute to changes in locomotor  
463 patterning as has been described in other studies (Quinlan et al., 2017; Allodi et al., 2021). Further  
464 studies are warranted to examine how inhibitory interneurons may be differently modulated in a  
465 subtype-specific manner in animal models of ALS.

466

#### 467 *Functional implications for impaired inhibitory circuits*

468 Outward signs of improperly functioning inhibitory interneurons may be apparent from subtle changes  
469 in motor patterning and could potentially be used as a biomarker of early ALS. Locomotor disturbances  
470 have been demonstrated *in vivo* in presymptomatic SOD1 mice during walking/running (Vinsant et al.,  
471 2013; Akay, 2014; Quinlan et al., 2017; Allodi et al., 2021). In the embryonic and neonatal spinal cord *in*  
472 *vitro*, increased duration of depolarizing events in MNs and a slower period of locomotor-related  
473 bursting has been described (Medelin et al., 2016; Branchereau et al., 2019), which indicate that even  
474 during development the functioning of locomotor circuits is already impaired. In presymptomatic adult  
475 mice capable of running on a treadmill, subtle locomotor differences are observed including advanced  
476 intermuscular phasing and a slower speed (Quinlan et al., 2017; Allodi et al., 2021) which indicate that

477 before any large scale neurodegeneration occurs, there are changes in patterns of activity in MNs and  
478 interneurons that could be exploited for use as a biomarker of ALS. At initial symptom onset, the first  
479 failure of the tibialis anterior manifests as abnormality in the swing phase of the ankle (Akay, 2014).  
480 Interestingly, silencing different interneuron populations (including inhibitory interneurons and  
481 cholinergic interneurons) reveals the contribution of each population: silencing cholinergic interneurons  
482 increases locomotor deficits in SOD1 mice (Landoni et al., 2019), while silencing inhibitory interneurons  
483 has no effect suggesting these interneurons are already impaired (Allodi et al., 2021).

484

#### 485 *Clinical-translational implications*

486 Evidence of MN hyperexcitability in ALS patients is present alongside signs of dysfunction in inhibition  
487 (Rothstein et al., 1992; Plaitakis and Constantakakis, 1993; Raynor and Shefner, 1994; Shefner and  
488 Logigian, 1998; Andreadou et al., 2008; Bae et al., 2013). Perhaps reducing excitability (with riluzole, for  
489 example) only results in a modest increase in lifespan (Bensimon et al., 1994) because it could be helpful  
490 to MNs while exacerbating inhibitory dysfunction by further depressing excitability of inhibitory  
491 interneurons like RCs. Thus, a more targeted approach to reduce MN excitability could be beneficial  
492 early in disease pathology. Stimulation of inhibitory nerves or certain protocols of transcranial  
493 stimulation could be explored, along with augmentation of inhibitory neurotransmission.

494

#### 495 **Data Availability Statement**

496 All data presented in this article were included in the Figures and Tables. Data were excluded only based  
497 on the criteria stated in the methods.

498

#### 499 **Competing interests**

500 Authors have no competing interests/conflicts of interest.

501

#### 502 **Author contributions**

503 CFC: acquisition of imaging data, analysis of 3D reconstruction data, statistics and writing the manuscript

504 PRS: analysis of electrophysiology and statistical data, and revising the manuscript

505 LMM: analysis of statistical data, revising the manuscript

506 KJL: analysis of 3D reconstruction data, revising the manuscript

507 ACP: analysis of electrophysiology data, revising the manuscript

508 NK: conception and design of the work, revising the manuscript

509 KAQ: conception and design of the work, acquisition of electrophysiology and imaging data, analysis of  
510 electrophysiological data, statistics and writing the manuscript

511 All authors approved the final version of the manuscript; agreed to be accountable for all aspects of the  
512 work in ensuring that questions related to the accuracy or integrity of any part of the work are  
513 appropriately investigated and resolved; and all persons designated as authors qualify for authorship,  
514 and all those who qualify for authorship are listed.

515

### 516 **Funding**

517 This project was funded by a springboard fellowship from Target ALS to KAQ and a University of Rhode  
518 Island Graduate School Tuition Scholarship to LMM.

519

### 520 **Acknowledgments**

521 The authors made use of equipment supported by the Institutional Development Award (IDeA) Network  
522 for Biomedical Research Excellence from the National Institute of General Medical Sciences of the  
523 National Institutes of Health under grant number P20GM103430. The authors thank Drs. Emily Reedich,  
524 Claudia Fallini and Marin Manuel for comments on the initial drafts of the manuscript.

525

## 526 **References**

- 527 Akay T (2014) Long-term measurement of muscle denervation and locomotor behavior in individual  
528 wild-type and ALS model mice. *J Neurophysiol* 111:694–703.
- 529 Allain A-E, Bairi A, Meyrand P, Branchereau P (2006) Expression of the Glycinergic System During the  
530 Course of Embryonic Development in the Mouse Spinal Cord and its Co-Localization with GABA  
531 Immunoreactivity. *J Comp Neurol* 496:832–846.
- 532 Allodi I, Montañana-Rosell R, Selvan R, Löw P, Kiehn O (2021) Locomotor deficits in a mouse model of  
533 ALS are paralleled by loss of V1-interneuron connections onto fast motor neurons. *Nat Commun* 12:1–  
534 18 Available at: <http://dx.doi.org/10.1038/s41467-021-23224-7>.
- 535 Amendola J, Durand J (2008) Morphological differences between wild-type and transgenic superoxide  
536 dismutase 1 lumbar motoneurons in postnatal mice. *J Comp Neurol* 511:329–341.
- 537 Andreadou E, Kapaki E, Kokotis P, Paraskevas GP, Katsaros N, Libitaki G, Petropoulou O, Zis V, Sfagos C,  
538 Vassilopoulos D (2008) Plasma glutamate and glycine levels in patients with amyotrophic lateral  
539 sclerosis. *In Vivo (Brooklyn)* 22:137–142.
- 540 Avossa D, Grandolfo M, Mazzarol F, Zatta M, Ballerini L (2006) Early signs of motoneuron vulnerability in  
541 a disease model system: Characterization of transverse slice cultures of spinal cord isolated from  
542 embryonic ALS mice. *Neuroscience* 138:1179–1194.
- 543 Bae JS, Simon NG, Menon P, Vucic S, Kiernan C, Doyle AC, Case-book T, Holmes S (2013) The Puzzling  
544 Case of Hyperexcitability in Amyotrophic Lateral Sclerosis What Really is Hyperexcitability in ALS ? How  
545 Can We Objectively Assess. *J Clin Neurol* 9:65–74.
- 546 Bensimon G, Lacomblez L, Meininger V (1994) A Controlled Trial of Riluzole in Amyotrophic Lateral  
547 Sclerosis. *N Engl J Med* 330:585–591.
- 548 Bikoff JB, Gabitto MI, Rivard AF, Drobac E, Machado TA, Miri A, Brenner-Morton S, Famojure E, Diaz C,  
549 Alvarez FJ, Mentis GZ, Jessell TM (2016) Spinal Inhibitory Interneuron Diversity Delineates Variant Motor  
550 Microcircuits. *Cell* 165:207–219 Available at:  
551 <http://www.embase.com/search/results?subaction=viewrecord&from=export&id=L608793625%0Ahttp://dx.doi.org/10.1016/j.cell.2016.01.027>.
- 552
- 553 Branchereau P, Martin E, Supiot L, Hodeib F, Laupénie A, Dalvi U, Zhu H, Cazenave W, Cattaert D (2019)  
554 Relaxation of synaptic inhibitory events as a compensatory mechanism in fetal SOD spinal motor  
555 networks. *Elife* 8:1–28.
- 556 Casas C, Herrando-Grabulosa M, Manzano R, Mancuso R, Osta R, Navarro X (2013) Early presymptomatic

557 cholinergic dysfunction in a murine model of amyotrophic lateral sclerosis. *Brain Behav* 3:145–158.

558 Chang Q, Martin LJ (2009a) Glycinergic Innervation of Motoneurons Is Deficient in Amyotrophic Lateral  
559 Sclerosis Mice A Quantitative Confocal Analysis. *Am J Pathol* 174:574–585.

560 Chang Q, Martin LJ (2009b) Glycinergic innervation of motoneurons is deficient in amyotrophic lateral  
561 sclerosis mice: A quantitative confocal analysis. *Am J Pathol* 174:574–585.

562 Clark RM, Blizzard CA, Young KM, King AE, Dickson TC (2017) Calretinin and Neuropeptide y interneurons  
563 are differentially altered in the motor cortex of the SOD1 G93A mouse model of ALS. *Sci Rep* 7:1–13  
564 Available at: <http://dx.doi.org/10.1038/srep44461>.

565 Clark RM, Brizuela M, Blizzard CA, Dickson TC (2018) Reduced excitability and increased neurite  
566 complexity of cortical interneurons in a familial mouse model of amyotrophic lateral sclerosis. *Front Cell*  
567 *Neurosci* 12:1–7.

568 Delestrée N, Manuel M, Iglesias C, Elbasiouny SM, Heckman CJ, Zytnicki D (2014) Adult spinal  
569 motoneurons are not hyperexcitable in a mouse model of inherited amyotrophic lateral sclerosis. *J*  
570 *Physiol* 592:1687–1703.

571 Devlin AC, Burr K, Borooh S, Foster JD, Cleary EM, Geti I, Vallier L, Shaw CE, Chandran S, Miles GB  
572 (2015) Human iPSC-derived motoneurons harbouring TARDBP or C9ORF72 ALS mutations are  
573 dysfunctional despite maintaining viability. *Nat Commun* 6:1–12 Available at:  
574 <http://dx.doi.org/10.1038/ncomms6999>.

575 Dukkupati SS, Chihi A, Wang Y, Elbasiouny SM (2016) Experimental Design and Data Analysis Issues  
576 Contribute to Inconsistent Results of C-Bouton Changes in Amyotrophic Lateral Sclerosis. *eNeuro* 4:1–  
577 13.

578 Dukkupati SS, Garrett TL, Elbasiouny SM (2018) The vulnerability of spinal motoneurons and soma size  
579 plasticity in a mouse model of amyotrophic lateral sclerosis. *J Physiol* 596:1723–1745.

580 Filipchuk AA, Durand J (2012) Postnatal dendritic development in lumbar motoneurons in mutant  
581 superoxide dismutase 1 mouse model of amyotrophic lateral sclerosis. *Neuroscience* 209:144–154  
582 Available at: <http://dx.doi.org/10.1016/j.neuroscience.2012.01.046>.

583 Flynn JR, Conn VL, Boyle KA, Hughes DI, Watanabe M, Velasquez T, Goulding MD, Callister RJ, Graham  
584 BA (2017) Anatomical and molecular properties of long descending propriospinal neurons in mice. *Front*  
585 *Neuroanat* 11:1–13.

586 Fogarty MJ, Kanjhan R, Bellingham MC, Noakes PG (2016) Glycinergic neurotransmission: A potent  
587 regulator of embryonic motor neuron dendritic morphology and synaptic plasticity. *J Neurosci* 36:80–87.



588 Genç B, Jara JH, Lagrimas AKB, Pytel P, Roos RP, Mesulam MM, Geula C, Bigio EH, Özdinler PH (2017)  
589 Apical dendrite degeneration, a novel cellular pathology for Betz cells in ALS. *Sci Rep* 7:1–10 Available at:  
590 <http://dx.doi.org/10.1038/srep41765>.

591 Gunes ZI, Kan VWY, Ye XQ, Liebscher S (2020) Exciting Complexity: The Role of Motor Circuit Elements in  
592 ALS Pathophysiology. *Front Neurosci* 14:1–30.

593 Hayashi H, Suga M, Satake M, Tsubaki T (1981) Reduced glycine receptor in the spinal cord in  
594 amyotrophic lateral sclerosis. *Ann Neurol* 9:292–294.

595 Hegedus J, Putman CT, Gordon T (2007) Time course of preferential motor unit loss in the SOD1G93A  
596 mouse model of amyotrophic lateral sclerosis. *Neurobiol Dis* 28:154–164.

597 Herron LR, Miles GB (2012) GENDER-SPECIFIC PERTURBATIONS IN MODULATORY INPUTS TO  
598 MOTONEURONS IN A MOUSE MODEL OF AMYOTROPHIC LATERAL SCLEROSIS. *Neuroscience* 226:313–  
599 323 Available at: <http://dx.doi.org/10.1016/j.neuroscience.2012.09.031>.

600 Hossaini M, Cano SC, Van Dis V, Haasdijk ED, Hoogenraad CC, Holstege JC, Jaarsma D (2011) Spinal  
601 inhibitory interneuron pathology follows motor neuron degeneration independent of glial mutant  
602 superoxide dismutase 1 expression in SOD1-ALS mice. *J Neuropathol Exp Neurol* 70:662–677.

603 Howells J, Sangari S, Matamala JM, Kiernan MC, Marchand-Pauvert V, Burke D (2020) Interrogating  
604 interneurone function using threshold tracking of the H reflex in healthy subjects and patients with  
605 motor neurone disease. *Clin Neurophysiol* 131:1986–1996.

606 Irvin CW, Kim RB, Mitchell CS (2015) Seeking homeostasis: Temporal trends in respiration, oxidation, and  
607 calcium in SOD1 G93A amyotrophic lateral sclerosis mice. *Front Cell Neurosci* 9:1–11.

608 Jensen DB, Kadlecova M, Allodi I, Meehan CF (2020) Spinal motoneurons are intrinsically more  
609 responsive in the adult G93A SOD1 mouse model of Amyotrophic Lateral Sclerosis. *J Physiol*.

610 Jonas P, Bischofberger J, Sandkühler J (1998) Corelease of two fast neurotransmitters at a central  
611 synapse. *Science (80- )* 281:419–424.

612 Kim J, Hughes EG, Shetty AS, Arlotta P, Goff LA, Bergles DE, Brown SP (2017) Changes in the Excitability  
613 of Neocortical Neurons in a Mouse Model of Amyotrophic Lateral Sclerosis Are Not Specific to  
614 Corticospinal Neurons and Are Modulated by Advancing Disease. *J Neurosci* 37:9037–9053 Available at:  
615 <http://www.jneurosci.org/lookup/doi/10.1523/JNEUROSCI.0811-17.2017>.

616 Kuo JJ, Schonewille M, Siddique T, Schults AN, Fu R, Bar PR, Anelli R, Heckman C, Kroese AB (2004)  
617 Hyperexcitability of Cultured Spinal Motoneurons From Presymptomatic ALS Mice. *J Neurophysiol*  
618 91:571–575 Available at: <http://jn.physiology.org/cgi/doi/10.1152/jn.00665.2003>.

619 Kuo JJ, Siddique T, Fu R, Heckman CJ (2005) Increased persistent Na<sup>+</sup> current and its effect on  
620 excitability in motoneurons cultured from mutant SOD1 mice. *J Physiol* 563:843–854.

621 Kuo SW, Binder MD, Heckman CJ (2020) Excessive Homeostatic Gain in Spinal Motoneurons in a Mouse  
622 Model of Amyotrophic Lateral Sclerosis. *Sci Rep* 10.

623 Landoni LM, Myles JR, Wells TL, Mayer WP, Akay T (2019) Cholinergic modulation of motor neurons  
624 through the C-boutons are necessary for the locomotor compensation for severe motor neuron loss  
625 during amyotrophic lateral sclerosis disease progression. *Behav Brain Res* 369.

626 Leroy F, Lamotte d'Incamps B, Imhoff-Manuel RD, Zytnicki D (2014) Early intrinsic hyperexcitability does  
627 not contribute to motoneuron degeneration in amyotrophic lateral sclerosis. *Elife* 3:1–25.

628 Malessa S, Leigh PN, Bertel O, Sluga E, Hornykiewicz O (1991) Amyotrophic lateral sclerosis: glutamate  
629 dehydrogenase and transmitter amino acids in the spinal cord. *J Neurol Neurosurg Psychiatry* 54:984–  
630 988.

631 Martin E, Cazenave W, Cattaert D, Branchereau P (2013) Embryonic alteration of motoneuronal  
632 morphology induces hyperexcitability in the mouse model of amyotrophic lateral sclerosis. *Neurobiol Dis*  
633 54:116–126.

634 Martin LJ, Liu Z, Chen K, Price AC, Pan Y, Swaby JA, Golden WC (2007) Motor Neuron Degeneration in  
635 Amyotrophic Lateral Sclerosis Mutant Superoxide Dismutase-1 Transgenic Mice: Mechanisms of  
636 Mitochondriopathy and Cell Death. *J Comp Neurol* 500:20–46.

637 Martinez-Silva M de L, Imhoff-Manuel RD, Sharma A, Heckman C, Shneider NA, Roselli F, Zytnicki D,  
638 Manuel M (2018) Hypoexcitability precedes denervation in the large fast-contracting motor units in two  
639 unrelated mouse models of ALS. *Elife* 7:1–26.

640 McGown A, McDeamid JR, Panagiotaki N, Tong H, Al Mashhadi S, Redhead N, Lyon AN, Beattie CE, Shaw  
641 PJ, Ramesh TM (2013) Early interneuron dysfunction in ALS: Insights from a mutant sod1 zebrafish  
642 model. *Ann Neurol* 73:246–258.

643 Medelin M, Rancic V, Cellot G, Laishram J, Veeraraghavan P, Rossi C, Muzio L, Sivilotti L, Ballerini L (2016)  
644 Altered development in GABA co-release shapes glycinergic synaptic currents in cultured spinal slices of  
645 the SOD1G93A mouse model of amyotrophic lateral sclerosis. *J Physiol* 594:3827–3840.

646 Milan L, Courtand G, Carroit L, Masméjean F, Barrière G, Cazalets JR, Garret M, Bertrand SS (2015) Age-  
647 related changes in pre- and postsynaptic partners of the cholinergic C-boutons in wild-type and  
648 SOD1G93A lumbar motoneurons. *PLoS One* 10:1–21.

649 Niebroj-Dobosz I, Janik P (1999) Amino acids acting as transmitters in amyotrophic lateral sclerosis (ALS).

650 Acta Neurol Scand 100:6–11.

651 Nishimaru H, Sakagami H, Kakizaki M, Yanagawa Y (2011) Locomotor-related activity of GABAergic  
652 interneurons localized in the ventrolateral region in the isolated spinal cord of neonatal mice. J  
653 Neurophysiol 106:1782–1792.

654 Ozdinler PH, Benn S, Yamamoto TH, Guzel M, Brown RH, Macklis JD (2011) Corticospinal Motor Neurons  
655 and Related Subcerebral Projection Neurons Undergo Early and Specific Neurodegeneration in  
656 hSOD1G93A Transgenic ALS Mice. J Neurosci 31:4166–4177 Available at:  
657 <http://www.jneurosci.org/cgi/doi/10.1523/JNEUROSCI.4184-10.2011>.

658 Özyurt MG, Topkara B, İşak B, Türker KS (2020) Amyotrophic lateral sclerosis weakens spinal recurrent  
659 inhibition and post-activation depression. Clin Neurophysiol 131:2875–2886.

660 Pambo-Pambo A, Durand J, Gueritaud J-P (2009) Early excitability changes in lumbar motoneurons of  
661 transgenic SOD1G85R and SOD1G(93A-Low) mice. J Neurophysiol 102:3627–3642 Available at:  
662 <http://www.ncbi.nlm.nih.gov/pubmed/19828728>.

663 Perry S, Gezelius H, Larhammar M, Hilscher MM, Lamotte d’Incamps B, Leao KE, Kullander K (2015)  
664 Firing properties of Renshaw cells defined by Chrna2 are modulated by hyperpolarizing and small  
665 conductance ion currents  $I_h$  and  $I_{SK}$ . Eur J Neurosci 41:887–898.

666 Pieri M, Carunchio I, Curcio L, Mercuri NB, Zona C (2009) Increased persistent sodium current  
667 determines cortical hyperexcitability in a genetic model of amyotrophic lateral sclerosis. Exp Neurol  
668 215:368–379 Available at: <http://dx.doi.org/10.1016/j.expneurol.2008.11.002>.

669 Piotrkiewicz M, Hausmanowa-Petrusewicz I (2011) Motoneuron afterhyperpolarisation duration in  
670 amyotrophic lateral sclerosis. J Physiol 589:2745–2754.

671 Plaitakis A, Constantakakis E (1993) Altered metabolism of excitatory amino acids, N-acetyl-aspartate  
672 and N-acetyl-aspartylglutamate in amyotrophic lateral sclerosis. Brain Res Bull 30:381–386.

673 Pullen AH, Athanasiou D (2009) Increase in presynaptic territory of C-terminals on lumbar motoneurons  
674 of G93A SOD1 mice during disease progression. Eur J Neurosci 29:551–561.

675 Pun S, Santos AF, Saxena S, Xu L, Caroni P (2006) Selective vulnerability and pruning of phasic  
676 motoneuron axons in motoneuron disease alleviated by CNTF. Nat Neurosci 9:408–419.

677 Quinlan KA, Kajtaz E, Ciolino JD, Imhoff-Manuel RD, Tresch MC, Heckman CJ, Tysseling VM (2017)  
678 Chronic electromyograms in treadmill running SOD1 mice reveal early changes in muscle activation. J  
679 Physiol 595:5387–5400.

680 Quinlan KA, Lamano JB, Samuels J, Heckman CJ (2015) Comparison of dendritic calcium transients in

681 juvenile wild type and SOD1G93A mouse lumbar motoneurons. *Front Cell Neurosci* 9:1–13 Available at:  
682 <http://journal.frontiersin.org/article/10.3389/fncel.2015.00139/abstract>.

683 Quinlan KA, Schuster JE, Fu R, Siddique T, Heckman CJ (2011) Altered postnatal maturation of electrical  
684 properties in spinal motoneurons in a mouse model of amyotrophic lateral sclerosis. *J Physiol* 589:2245–  
685 2260 Available at: <http://doi.wiley.com/10.1113/jphysiol.2010.200659>.

686 Raynor EM, Shefner JM (1994) Recurrent inhibition is decreased in patients with amyotrophic lateral  
687 sclerosis. *Neurology* 44:2148–2153.

688 Restrepo CE, Lundfald L, Szabó G, Erdélyi F, Zeilhofer HU, Glover JC, Kiehn O (2009) Transmitter-  
689 phenotypes of commissural interneurons in the lumbar spinal cord of newborn mice. *J Comp Neurol*  
690 517:177–192.

691 Rothstein JD, Martin LJ, Kuncl RW (1992) Decreased Glutamate Transport by the Brain and Spinal Cord in  
692 Amyotrophic Lateral Sclerosis. *N Engl J Med* 326:1464–1468.

693 Saba L, Viscomi MT, Caioli S, Pignataro A, Bisicchia E, Pieri M, Molinari M, Ammassari-Teule M, Zona C  
694 (2016) Altered Functionality, Morphology, and Vesicular Glutamate Transporter Expression of Cortical  
695 Motor Neurons from a Presymptomatic Mouse Model of Amyotrophic Lateral Sclerosis. *Cereb Cortex*  
696 26:1512–1528.

697 Saba L, Viscomi MT, Martini A, Caioli S, Mercuri NB, Guatteo E, Zona C (2019) Modified age-dependent  
698 expression of NaV1.6 in an ALS model correlates with motor cortex excitability alterations. *Neurobiol Dis*  
699 130:104532 Available at: <https://doi.org/10.1016/j.nbd.2019.104532>.

700 Sangari S, Iglesias C, El Mendili MM, Benali H, Pradat PF, Marchand-Pauvert V (2016) Impairment of  
701 sensory-motor integration at spinal level in amyotrophic lateral sclerosis. *Clin Neurophysiol* 127:1968–  
702 1977.

703 Saxena S, Roselli F, Singh K, Leptien K, Julien JP, Gros-Louis F, Caroni P (2013) Neuroprotection through  
704 Excitability and mTOR Required in ALS Motoneurons to Delay Disease and Extend Survival. *Neuron*  
705 80:80–96 Available at: <http://dx.doi.org/10.1016/j.neuron.2013.07.027>.

706 Shefner JM, Logigian EL (1998) The mixed nerve silent period in normal subjects and patients with  
707 amyotrophic lateral sclerosis. *Electromyogr Clin Neurophysiol* 38:505–510.

708 Siembab VC, Smith CA, Zagoraiou L, Berrocal MC, Mentis GZ, Alvarez FJ (2010) Target selection of  
709 proprioceptive and motor axon synapses on neonatal V1-derived Ia inhibitory interneurons and  
710 Renshaw cells. *J Comp Neurol* 518:4675–4701.

711 Vinsant S, Mansfield C, Jimenez-Moreno R, Moore VDG, Yoshikawa M, Hampton TG, Prevet D, Caress

712 J, Oppenheim RW, Milligan C (2013) Characterization of early pathogenesis in the SOD1G93A mouse  
713 model of ALS: Part II, results and discussion. *Brain Behav* 3:431–457.

714 Wainger BJ, Kiskinis E, Mellin C, Wiskow O, Han SSW, Sandoe J, Perez NP, Williams LA, Lee S, Boulting G,  
715 Berry JD, Brown RH, Cudkowicz ME, Bean BP, Eggan K, Woolf CJ (2014) Intrinsic membrane  
716 hyperexcitability of amyotrophic lateral sclerosis patient-derived motor neurons. *Cell Rep* 7:1–11  
717 Available at: <http://dx.doi.org/10.1016/j.celrep.2014.03.019>.

718 Whitehouse PJ, Wamsley JK, Zarbin MA, Price DL, Tourtellotte WW, Kuhar MJ (1983) Amyotrophic  
719 lateral sclerosis: Alterations in neurotransmitter receptors. *Ann Neurol* 14:8–16.

720 Willis W, Willis JC (1964) Location of Renshaw Cells. *Nature* 204:1214–1215.

721 Wootz H, Fitzsimons-Kantamneni E, Larhammar M, Rotterman TM, Enjin A, Patra K, André E, Van  
722 Zundert B, Kullander K, Alvarez FJ (2013) Alterations in the motor neuron-renshaw cell circuit in the  
723 Sod1G93A mouse model. *J Comp Neurol* 521:1449–1469.

724 Zeilhofer HU, Studler B, Arabadzisz D, Schweizer C, Ahmadi S, Layh B, Bösl MR, Fritschy JM (2005)  
725 Glycinergic neurons expressing enhanced green fluorescent protein in bacterial artificial chromosome  
726 transgenic mice. *J Comp Neurol* 482:123–141.

727

728
